1 **Brain networks and cognitive impairment in Parkinson's disease**

2

3

4 Rosaria Rucco<sup>1,2,+</sup>, Anna Lardone<sup>3,+</sup>, Marianna Liparoti<sup>2</sup>, Emahnuel Troisi Lopez<sup>2</sup>, Rosa De Micco<sup>4</sup>,

5 Alessandro Tessitore<sup>4</sup>, Carmine Granata<sup>2</sup>, Laura Mandolesi<sup>5</sup>, Giuseppe Sorrentino<sup>1,2,6,\*</sup>, Pierpaolo

6 Sorrentino<sup>2,7</sup>

7

8 <sup>1</sup> Department of Motor Sciences and Wellness, University of Naples Parthenope, Naples, Italy

9 <sup>2</sup> Institute for Applied Science and Intelligent Systems, National Research Council, Pozzuoli, Italy

10 <sup>3</sup> Department of Social and Developmental Psychology, University of Rome "Sapienza", Italy

11 <sup>4</sup> Department of Advanced Medical and Surgical Sciences, University of Campania "Luigi Vanvitelli",

12 Naples, Italy

13 <sup>5</sup> Department of Humanistic Studies, University of Naples Federico II, Naples, Italy

14 <sup>6</sup> Hermitage-Capodimonte Hospital, Naples, Italy

15 <sup>7</sup> Institut de Neurosciences des Systèmes, Aix-Marseille University, Marseille, France

16

17 \* **Corresponding author:** Giuseppe Sorrentino, [giuseppe.sorrentino@uniparthenope.it](mailto:giuseppe.sorrentino@uniparthenope.it)

18 + These authors contributed equally to the manuscript

19

20 **Keywords:** Magnetoencephalography, Functional connectivity, Synchrony, Cognition, Graph

21 Theory, Brain networks topology

22

23 **Running title:** Brain networks in Parkinson's Disease

24

25

26 **Abstract**

27 Aim

28 The aim of the present study is to investigate the relations between both functional connectivity  
29 and brain networks with cognitive decline, in patients with Parkinson's disease (PD).

30 Introduction

31 PD phenotype is not limited to motor impairment but, rather, a wide range of non-motor  
32 disturbances can occur, cognitive impairment being one of the commonest. However, how the  
33 large-scale organization of brain activity differs in cognitively impaired patients, as opposed to  
34 cognitively preserved ones, remains poorly understood.

35 Methods

36 Starting from source-reconstructed resting-state magnetoencephalography data, we applied the  
37 PLM to estimate functional connectivity, globally and between brain areas, in PD patients with and  
38 without cognitive impairment (respectively PD-CI and PD-NC), as compared to healthy subjects  
39 (HS). Furthermore, using graph analysis, we characterized the alterations in brain network  
40 topology and related these, as well as the functional connectivity, to cognitive performance.

41 Results

42 We found reduced global and nodal PLM in several temporal (fusiform gyrus, Heschl's gyrus and  
43 inferior temporal gyrus), parietal (postcentral gyrus), and occipital (lingual gyrus) areas within the  
44 left hemisphere, in the gamma band, in PD-CI patients, as compared to PD-NC and HS. With  
45 regard to the global topological features, PD-CI patients, as compared to HS and PD-NC patients,  
46 showed differences in multi frequencies bands (delta, alpha, gamma) in the Leaf fraction, Tree  
47 hierarchy (both higher in PD-CI) and Diameter (lower in PD-CI). Finally, we found statistically  
48 significant correlations between the MoCA test and both the Diameter in delta band and the Tree  
49 Hierarchy in the alpha band.

50 Conclusion

51 Our work points to specific large-scale rearrangements that occur selectively in cognitively  
52 compromised PD patients and correlated to cognitive impairment.

## 53 **Introduction**

54           Unlike what James Parkinson claimed over two hundred years ago about the disease bearing  
55 his name, ("the senses and intellects being uninjured") (Walshe, 1961), today we know that  
56 Parkinson's disease (PD) is not solely a motor disease (Vitale et al., 2012). Indeed, PD is  
57 characterized by a broad spectrum of non-motor symptoms, including neuropsychiatric disturbances,  
58 autonomic dysfunctions and cognitive decline. After twenty years of disease duration, up to 80% of  
59 patients present with severe cognitive symptomatology (Aarsland et al., 2009). However, despite  
60 extensive investigation, the pathophysiological mechanisms underlying cognitive decline remain  
61 unclear (Aarsland and Kurz, 2010).

62           In the early stage of the disease, the brainstem and the surviving neurons of the nigrostriatal  
63 dopamine system are mostly affected by alpha synuclein depositions while, with disease  
64 progression, the neuropathological process spreads to other brain regions, including the cortex  
65 (Braak et al., 2003). Hence, PD may be regarded as a whole-brain disease.

66           Cognitive functions need coordinated interactions between multiple brain areas.  
67 Synchronization is one of the putative mechanisms of information routing across brain areas  
68 (Buzsáki and Draguhn, 2004). Accordingly, different electroencephalographic (EEG) or  
69 magnetoencephalographic (MEG) studies observed a relationship between neural synchrony and  
70 cognitive functions (Singer, 1999; Varela et al., 2001). Graph theory is a mathematically principled  
71 way to represent complex interactions among multiple elements. In this context, brain areas are  
72 represented as nodes, and their interactions are the links (Rubinov and Sporns, 2010; Sporns et al.,  
73 2005). Measuring topological features of the brain networks is informative about the large-scale  
74 organization underpinning cognitive processes. Recently, graph theory has been applied to MEG  
75 signals in neurodegenerative diseases, demonstrating alterations in structural organization (Pievani  
76 et al., 2014) as well as in brain functional networks, such as in amyotrophic lateral sclerosis  
77 (Sorrentino et al., 2018), hereditary spastic paraplegia (Rucco et al., 2019), and mild cognitive  
78 impairment (Jacini et al., 2018).

79           Given its high spatial and temporal resolution, MEG is a useful tool for detecting the evolution  
80 of brain functional connectivity. MEG systems measure the magnetic fields produced by neuronal

81 activity, which are undistorted by the layers surrounding the brain. Therefore, it is possible to  
82 reconstruct the neural signals produced by different brain areas (source space) (Baillet, 2017). In  
83 particular, MEG has a millisecond temporal resolution, making it possible to study frequency-specific  
84 networks, and records the oscillatory activity of brain regions, allowing to estimate the phase of brain  
85 signals and, hence, synchronization (Varela et al., 2001). Typically, the canonical frequency bands  
86 (delta, theta, alpha, beta and gamma) are taken into account to understand the cognitive processes  
87 (Lopes da Silva, 2013).

88         Stoffers et al. have analyzed the MEG signals during resting-state in a group of *de novo* PD  
89 patients, finding changes in brain activity which included a widespread increase in theta and low  
90 alpha power, and a loss of beta and gamma power (Stoffers et al., 2007). However, they did not  
91 find correlations between brain activity and disease duration, disease stage (i.e. Hoehn and Yahr,  
92 H&Y) (Hoehn and Yahr, 1967) and disease severity (i.e. Unified Parkinson's disease rating scale,  
93 UPDRS-III) (Fahn, 1987). The Authors hypothesized that the spectral power changes may be linked  
94 to the degeneration of non-dopaminergic ascending neurotransmitter systems. It has been  
95 demonstrated, especially in functional MRI (fMRI) studies, that the disruption of resting-state  
96 functional connectivity is important in the development of cognitive decline in PD (Amboni et al.,  
97 2018; Tessitore et al., 2012a). Some studies have compared, using MEG, the brain activity of non-  
98 demented and demented PD patients to that of matched healthy subjects. All in all, a general trend  
99 was found toward the slowing of resting brain activity in demented and (to a lesser extent) non-  
100 demented patients, as compared to healthy subjects. This slowing of oscillatory brain activity can be  
101 interpreted as a mechanism related to the progression of the disease and may be potentially involved  
102 in the development of dementia in PD (Bosboom et al., 2006; Dubbelink et al., 2013). In a source-  
103 level, resting-state MEG study, Olde Dubbelink et al. found pathologically altered functional networks  
104 in *de novo* PD patients (Olde Dubbelink et al., 2014) which can be interpreted as a reduction in local  
105 integration with preserved overall efficiency of the brain network. Furthermore, they have analyzed  
106 longitudinally 43 PD patients also, discovering progressive impairment in local integration in multiple  
107 frequency bands and loss of global efficiency in the PD brain network, related to a worse

108 performance in the Cambridge Cognition Examination (CAMCOG) scale (a test assessing the global  
109 cognitive function) (Roth et al., 1986).

110 Ultimately, starting from the observation that the synchronization in specific frequency bands  
111 between different brain areas is the basis of a variety of cognitive processes, our hypothesis is that  
112 in PD there could be abnormal neuronal synchronization that is reflected in changes in functional  
113 connectivity and, possibly, in the topological features of the brain networks. More specifically, we  
114 hypothesize that, in PD, the progressive alteration of the brain networks would be more pronounced  
115 in patients with clinically evident cognitive impairment, as compared to cognitively unimpaired  
116 patients. To test our hypotheses, we performed a resting state MEG recording in PD patients with  
117 and without cognitive impairment, and age- and sex- matched healthy subjects (HS). We estimated  
118 synchronization between the brain source-reconstructed time series using the phase linearity  
119 measurement (PLM) (Baselice et al., 2019). We then applied the minimum spanning tree (MST)  
120 algorithm (Tewarie et al., 2015) to reconstruct the brain networks, and analyzed both functional  
121 connectivity among brain areas and topological features of the network. Finally, we correlated our  
122 results to clinical motor, cognitive and behavioral PD-specific scales.

123

## 124 **Materials and methods**

### 125 **Participants**

126 Thirty-nine early PD patients were diagnosed according to the modified diagnostic criteria of  
127 the UK Parkinson's Disease Society Brain Bank (Gibb and Lees, 1988) and recruited at the  
128 Movement Disorders Unit of the First Division of Neurology at the University of Campania "Luigi  
129 Vanvitelli" (Naples, Italy). All subjects were right handed and native Italian speakers. Inclusion criteria  
130 were: a) PD onset after the age of 40 years, to exclude early onset parkinsonism; b) a modified H&Y  
131 stage  $\leq 2.5$ . Exclusion criteria were: a) dementia associated with PD according to consensus criteria  
132 (Emre et al., 2007); b) any other neurological disorder or clinically significant or unstable medical  
133 condition; c) any contraindications to MRI or MEG recordings. Disease severity was assessed using  
134 the H&Y stages and the UPDRS III. Motor clinical assessment was performed in the "off-state" (off-  
135 medication overnight). Levodopa equivalent daily dose (LEDD) was calculated for both dopamine

136 agonists (LEDD-DA) and dopamine agonists + L-dopa (total LEDD) (Tomlinson et al., 2010). Global  
 137 cognition was assessed by means of Montreal Cognitive Assessment (MoCA) (Nasreddine et al.,  
 138 2005). MoCA consists of 12 subtasks exploring the following cognitive domains: (1) memory (score  
 139 range 0–5), assessed by means of delayed recall of five nouns, after two verbal presentations; (2)  
 140 visuospatial abilities (score range 0–4), assessed by a clock-drawing task (3 points) and by copying  
 141 of a cube (1 point); (3) executive functions (score range 0–4), assessed by means of a brief version  
 142 of the Trail Making B task (1 point).

143 The patients were classified in two groups based on their age- and education-adjusted Italian  
 144 cut-off MoCA score (Conti et al., 2015). According to these criteria we selected 20 and 19 PD patients  
 145 with MoCA score respectively lower/equal (PD with cognitive impairment, PD-CI) or higher (PD with  
 146 normal cognition, PD-NC) than the cut-off of 23. Depressive and apathy symptoms were assessed  
 147 with the Beck Depression Index (BDI) (Beck et al., 1961) and the Apathy Evaluation Scale (AES)  
 148 (Marin et al., 1991), respectively.

149 Twenty HS, matched for age, education and sex were also enrolled. (See Table 1).

150 The study was approved by the local Institutional Human Research Ethics Committee and it  
 151 was conducted in accordance to the Declaration of Helsinki. All participants signed informed consent.

152

153 **Table 1: Demographic and clinical features of PD patients and healthy subjects**

|                                                          | PD-CI (n=20)<br>mean±SD | PD-NC (n=19)<br>mean±SD | HS (n=20)<br>mean±SD | p-value  |
|----------------------------------------------------------|-------------------------|-------------------------|----------------------|----------|
| <b>Age</b>                                               | 67.90±8.73              | 61.00±7.73              | 63.10±8.53           | p = 0.04 |
| <b>Sex (M/F)</b>                                         | 10/10                   | 6/13                    | 11/9                 | NS*      |
| <b>Disease duration (months)</b>                         | 31.00±13.66             | 35.16±16.36             | -                    | NS       |
| <b>H&amp;Y stage</b>                                     | 1.88±0.50               | 1.82±0.44               | -                    | NS       |
| <b>UPDRS III</b>                                         | 26.40±11.03             | 23.58±7.08              | -                    | NS       |
| <b>MoCA (total)</b>                                      | 19.96±2.30              | 25.05±1.63              | -                    | <0.001   |
| <b>Memory</b>                                            | 0.70±0.90               | 2.32±1.49               | -                    | <0.001   |
| <b>Visuospatial abilities</b>                            | 1.75±0.99               | 3.16±0.93               | -                    | <0.001   |
| - <b>Executive functions</b>                             | 1.35±1.28               | 3.37±0.58               | -                    | <0.001   |
| - <b>Attention, concentration and<br/>working memory</b> | 4.35±1.49               | 5.58±0.67               | -                    | <0.001   |
| - <b>Language</b>                                        | 4.30±1.23               | 5.58±0.67               | -                    | <0.001   |
| - <b>Temporal and spatial orientation</b>                | 5.85±0.36               | 5.89±0.45               | -                    | NS       |

|                   |               |               |   |    |
|-------------------|---------------|---------------|---|----|
| <b>BDI</b>        | 5.00±5.23     | 5.37±6.87     | - | NS |
| <b>Apathy</b>     | 30.25±7.14    | 29.79±6.32    | - | NS |
| <b>LEDD total</b> | 309.50±159.95 | 269.21±136.56 | - | NS |
| <b>LEDD DA</b>    | 67.00±145.64  | 90.26±103.50  | - | NS |

154

155 Data are expressed as mean± standard deviation (SD). PD-CI: Parkinson's disease patients with  
156 cognitive impairment; PD-NC: Parkinson's disease patients without cognitive impairment; HS:  
157 healthy subjects; NS\*: not significant among the three groups; NS: not significant between PD-CI  
158 and PD-NC; H&Y: Hoehn & Yahr; UPDRS: Unified Parkinson's Disease Rating Scale; MoCA:  
159 Montreal Cognitive Assessment; BDI: Beck depression inventory; LEDD: Levodopa Equivalent Daily  
160 Dose; DA: dopamine-agonist. Note: age was statistically significant different only between PD-CI  
161 and PD-NC, with a  $p = 0.04$ .

162

163

#### 164 **Magnetic Resonance Imaging acquisition**

165 MR images were acquired on a 3-T scanner equipped with an 8-channel parallel head coil  
166 (General Electric Healthcare, Milwaukee, WI, USA) either after, or a minimum of 21 days (but not  
167 more than one month) before the MEG recording. Three-dimensional T1-weighted images (gradient-  
168 echo sequence Inversion Recovery prepared Fast Spoiled Gradient Recalled-echo, time repetition  
169 = 6988 ms, TI = 1100 ms, TE = 3.9 ms, flip angle = 10, voxel size = 1 x 1 x 1.2 mm<sup>3</sup>) were acquired.

170

#### 171 **MEG acquisition**

172 The MEG system acquires the signals of 163 magnetometers placed in a magnetically shielded  
173 room (AtB Biomag, Ulm, Germany). Specifically, 154 sensors cover the entire head of the subject;  
174 the remaining ones, organized into three orthogonal triplets, are positioned more distant from the  
175 helmet and used to measure and reduce the environmental noise (Lardone et al., 2018; Sorrentino  
176 et al., 2017). MEG data were acquired during two, eyes-closed, resting state segments, each 3.5  
177 minutes long. The patients were in the off-state (i.e. after drug withdrawal for 24 hours, without the  
178 effects of the therapy).

179 In order to reconstruct the position of the head in the helmet during the MEG, we digitalized,  
180 before acquisition, the position of four reference coils (attached to the head of the subject) and four  
181 anatomical landmarks (nasion, right and left pre-auricular and apex) using Fastrak (Polhemus®). The  
182 coils were activated before each segment of the registration. During the MEG acquisition,  
183 electrocardiographic (ECG) and electrooculographic (EOG) signals were also recorded to remove  
184 physiological artefact (Gross et al., 2013; Rucco et al., 2019). After an anti-aliasing filter, the data  
185 were sampled at 1024 Hz.

186

### 187 **Preprocessing**

188 The MEG data were filtered in the band 0.5-48 Hz using a 4th-order Butterworth IIR band-  
189 pass filter, implemented offline using Matlab scripts within the Fieldtrip toolbox (Oostenveld et al.,  
190 2011). To reduce the environmental noise, Principal Component Analysis (PCA) was used (de  
191 Cheveigné and Simon, 2007; P.K. Sadasivan, 1996). Subsequently, an experienced rater identified  
192 the noisy channel/segments of acquisition through visual inspection. On average,  $140 \pm 4$  channels  
193 were used. After that, Independent Component Analysis (ICA) (Barbati et al., 2004) was performed  
194 to identify and remove ECG (typically 1-2 two components) and EOG (0-1 components) signals from  
195 the MEG data.

196

### 197 **Source reconstruction**

198 The subject's anatomical landmarks were visually identified on the native MRI of the subjects  
199 and used to co-register the MEG acquisition, which was then spatially normalized to a template MRI.  
200 Subsequently, the time series related to the centroids of 116 regions-of-interest (ROIs), derived by  
201 the Automated Anatomical Labelling (AAL) atlas (Gong et al., 2009; Tzourio-Mazoyer et al., 2002)  
202 were reconstructed based on Nolte's volume conduction model (Nolte, 2003) and the Linearly  
203 Constrained Minimum Variance (LCMV) beamformer algorithm (Van Veen et al., 1997). However,  
204 we considered only the first 90 ROIs, excluding those representing the cerebellum, given the low  
205 reliability of the reconstructed signal in those areas. For each ROI, we projected the time series along



206 the dipole direction that explained most variance by means of singular value decomposition (SVD),  
207 using Fieldtrip toolbox (Oostenveld et al., 2011).

208 The beamformer estimates the temporal series representing the activity of the brain regions.  
209 Such signals are filtered in the five canonical frequency bands (delta (0.5 – 4 Hz), theta (4.0 - 8.0  
210 Hz), alpha (8.0 – 13.0 Hz), beta (13.0 – 30.0 Hz) and gamma (30.0 – 48.0 Hz)), and analysed  
211 separately.

212

### 213 **Connectivity analysis**

214 To evaluate the synchronization between brain regions, we adopted the Phase Linearity  
215 Measurement (PLM) (Baselice et al., 2019). This novel, undirected metric, developed by our group,  
216 measures the synchronization between brain regions exploiting the power spectrum of their phase  
217 differences in time. It is defined as follows:

218

$$219 \quad PLM = \frac{\int_{-B}^B \left| \int_0^T e^{i\Delta\phi(t)} e^{-i2\pi f t} dt \right|^2 df}{\int_{-\infty}^{\infty} \left| \int_0^T e^{i\Delta\phi(t)} e^{-i2\pi f t} dt \right|^2 df} \quad (1)$$

220

221 where the  $\Delta\phi(t)$  represent the phase difference between two signals,  $2B$  is the integration band,  $f$   
222 is the frequency and  $T$  is the observation time interval. The PLM ranges between 0 and 1, where 1  
223 indicates perfect synchronization and 0 indicates non synchronous activity.

224 Based on PLM, we obtained a 90x90 weighted adjacency matrix for each temporal series (with a  
225 duration > 4s), for each subject, in each frequency band.

226 Starting from these weighted adjacency matrices we calculated, for each ROI, the nodal PLM  
227 for each ROI as the average PLM between a specific ROI and all other ROIs, and the global PLM  
228 as the average of all nodal PLM values.

229

### 230 **Network analysis**

231 Starting from the weighted adjacency matrices, we reconstructed, based on the minimum  
232 spanning tree (MST) algorithm, a binary network, where the 90 areas of the AAL atlas are the nodes  
233 and the entries represent the edges.

234 To describe the network, we computed nodal centrality measures (degree, betweenness  
235 centrality) and global, non-centrality (leaf fraction, degree divergence, diameter, tree hierarchy)  
236 metrics (Stam et al., 2014; Tewarie et al., 2015). The degree of a node is defined as the number of  
237 links incident on a given node. The betweenness centrality (BC) is the number of shortest paths  
238 passing through a given node over all the shortest paths of the network (Freeman, 1977). The leaf  
239 fraction (Lf) is the fraction of leaf nodes in the MST, where a leaf node is defined as a node with  
240 degree one (Boersma et al., 2013). The degree divergence (K) measures the broadness of the  
241 degree distribution (Tewarie et al., 2015). The diameter is defined as the longest shortest path of the  
242 MST. Lastly, the tree hierarchy (Th) is the number of leaves over the maximum betweenness  
243 centrality.

244

## 245 **Statistical analysis**

246 To test differences in age and sex among the three groups we use ANOVA and the Chi  
247 square, respectively, after checking the normal distribution of variables. Clinical parameters,  
248 between PD-CI and PD-NC patients, were compared using t-test.

249 The three groups were compared for each variable of interest (connectivity and topological  
250 metrics) using the permutational analysis of variance (PERMANOVA), a non-parametric test in order  
251 to evaluate the effect of cognitive impairment on brain connectivity in PD-CI, PD-NC patients and in  
252 controls. Then, all the p-values were corrected using the false discovery rate (FDR) (Benjamini and  
253 Hochberg, 1995), so as to account for multiple comparison between the variables. For the significant  
254 p values (after FDR correction), post-hoc analysis was carried out, using Scheffe's correction for  
255 multiple comparisons among groups.

256 To correlate the connectivity and topological metrics with the clinical scales, we used the  
257 Spearman's rank correlation coefficient. All statistical analyses were performed using custom scripts  
258 written in Matlab 2018a. The significance level was set at  $p < 0.05$ .

259

## 260 Results

### 261 Population Characteristics

262 The studied population consists of 20 PD-CI, 19 PD-NC patients and 20 HS. The gender  
263 among the three groups showed no significant difference. PD-NC were slightly younger than PD-CI  
264 patients ( $p = 0.04$ ), while no difference were found in terms of disease duration, disease stage (i.e.  
265 H&Y stage), motor impairment (i.e. UPDRS III), depression (i.e. BDI scale) and apathy (i.e. AES)  
266 between the two PD subgroups. As expected, significant differences were found in terms of MoCA  
267 scale and its subtests between PD-CI and PD-NC patients (Table 1).

268

### 269 MEG data

#### 270 Connectivity analysis

271 Regarding the global PLM value, we found a statistical significant difference in the gamma  
272 band among the groups with a  $p = 0.0416$  ( $H(2,58) = 3.365$ ), with post-hoc analysis showing that  
273 PD-CI patients differed from HS, having lower global PLM, see Fig. 1.

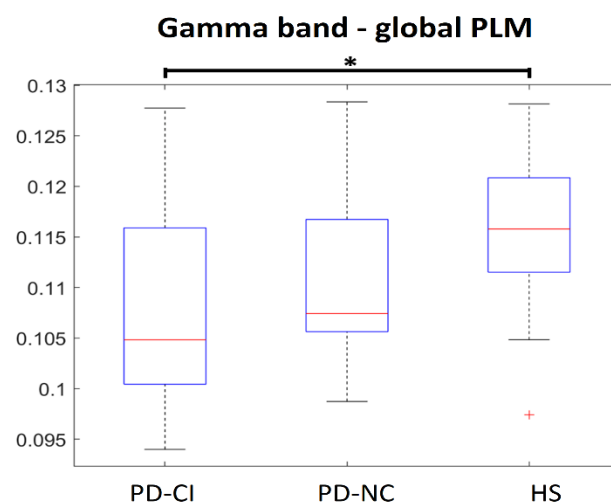

274

275 **Fig. 1 Differences in the global PLM value among PD-CI, PD-NC and HS.**

276 The box plots refer to differences in the global PLM value in gamma band among PD-CI, PD-NC and  
277 HS. The upper and lower bound of the box refer to the 25<sup>th</sup> to 75<sup>th</sup> percentiles, the median value is  
278 represented by horizontal line inside each box, the whiskers extent to the 10<sup>th</sup> and 90<sup>th</sup> percentiles,  
279 and further data are considered as outliers and represented by the symbol +. PD-CI group shows a

280 lower global PLM value as compared to both PD-NC group (without reaching statistical significance)  
281 and HS (\* =  $p < 0.05$ ).

282

283 When we compared the nodal PLM values among the three groups, we found differences in  
284 the gamma band in the following areas of the left hemisphere: Postcentral gyrus (H (2,58) = 6.578,  
285  $p = 0.002$ , pFDR = 0.039), Lingual gyrus (H (2,58) = 7.563,  $p = 0.001$ , pFDR = 0.039), Fusiform  
286 gyrus (H (2,58) = 9.279,  $p < 0.001$ , pFDR = 0.036), Heschl's gyrus (H (2,58) = 6.985,  $p = 0.002$ ,  
287 pFDR = 0.039), inferior Temporal gyrus (H (2,58) = 7.377,  $p = 0.001$ , pFDR = 0.039). In the post-  
288 hoc analysis, PD-CI patients showed a lower PLM value with respect to HS in all significant ROI,  
289 while PD-NC patients only reached statistical significance in the left lingual and the left Fusiform  
290 areas, as showed in Fig. 2.

### Gamma band - nodal PLM

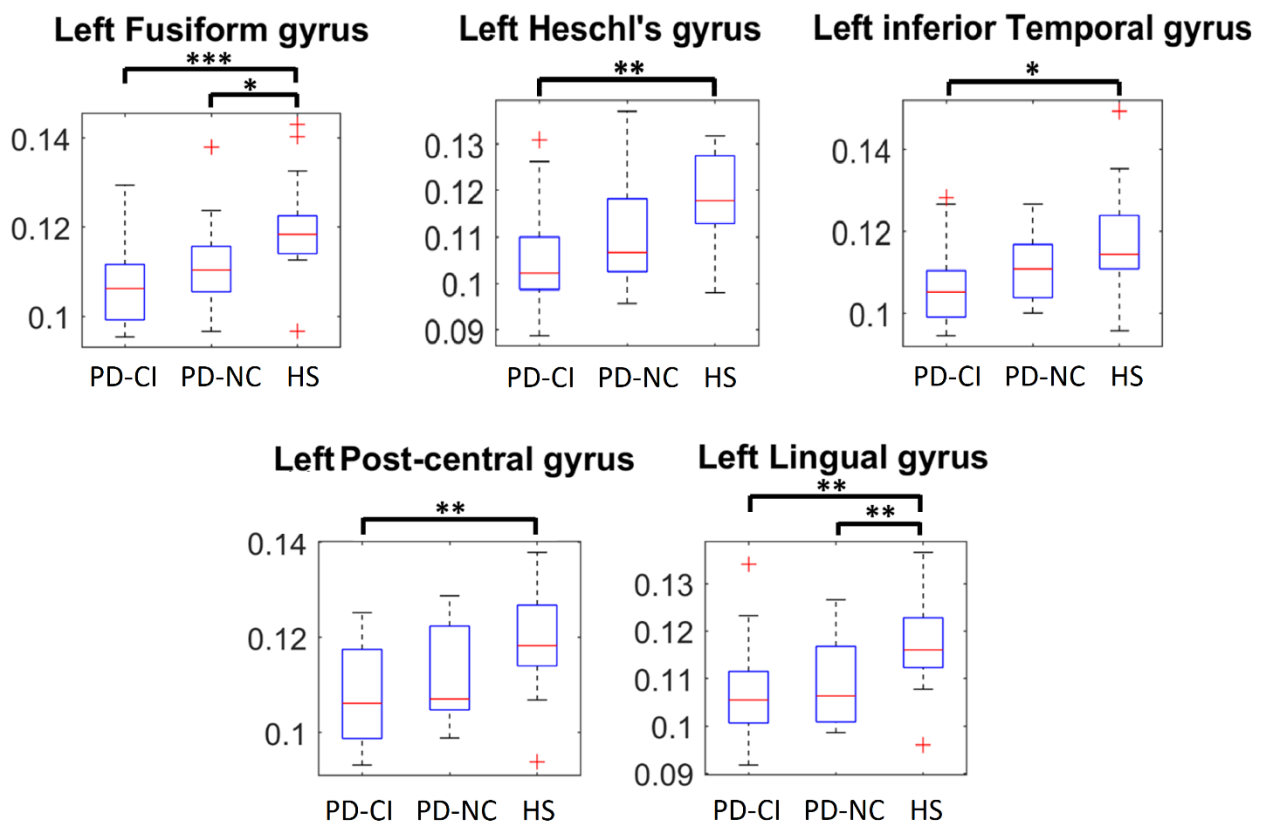

291

292

293 **Fig. 2 Differences in the nodal PLM values among PD-CI, PD-NC and HS.**

294 The box plots refer to differences in the nodal PLM value in gamma band among PD-CI, PD-NC and  
295 HS. The upper and lower bound of the box refer to the 25<sup>th</sup> to 75<sup>th</sup> percentiles, the median value is  
296 represented by horizontal line inside each box, the whiskers extent to the 10<sup>th</sup> and 90<sup>th</sup> percentiles,  
297 and further data are considered as outliers and represented by the symbol +. PD-CI group shows  
298 lower nodal PLM values in Fusiform gyrus, Heschl's gyrus and Inferior temporal gyrus, Post-central  
299 gyrus, Lingual gyrus, on the left, as compared to both PD-NC group and HS. \* =  $p < 0.05$ , \*\* =  $p <$   
300 0.01, \*\*\* =  $p < 0.001$

301

### 302 *Topological network analysis*

303 We found topological differences in the brain networks among PD-CI, PD-NC and HS, in  
304 different frequency bands. With respect to Lf, differences appeared in the delta ( $H(2,58) = 4.732$ ,  $p$   
305 = 0.012,  $pFDR = 0.049$ ), the alpha ( $H(2,58) = 4.371$ ,  $p = 0.017$ ,  $pFDR = 0.028$ ) and the gamma band  
306 ( $H(2,58) = 7.052$ ,  $p = 0.002$ ,  $pFDR = 0.012$ ). Post-hoc analysis showed that, in all the three bands,  
307 PD-CI patients had higher leaf fraction as compared to HS, as depicted in Fig. 3.

308

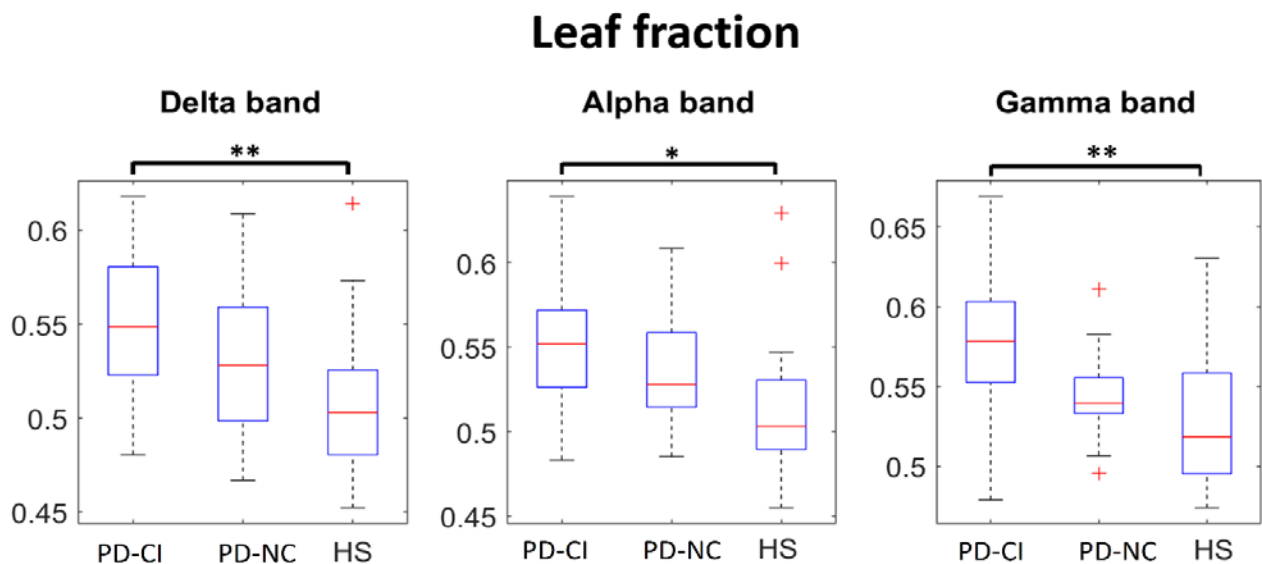

310 **Fig. 3 Differences in Leaf fraction parameter, among PD-CI, PD-NC and HS**

311 The box plots refer to differences in the Lf among respectively PD-CI, PD-NC and HS. The upper  
312 and lower bound of the box refer to the 25<sup>th</sup> to 75<sup>th</sup> percentiles, the median value is represented by

313 horizontal line inside each box, the whiskers extent to the 10<sup>th</sup> and 90<sup>th</sup> percentiles, and further data  
314 are considered as outliers and represented by the symbol +. PD-CI group shows a higher Lf,  
315 compared to both PD-NC group and HS, in delta, alpha and gamma band. \* = p<0.05, \*\* = p<0.01  
316

317 The Th differed among the three groups in the alpha (H (2,58) = 5.329, p = 0.006, pFDR =  
318 0.016) and the gamma band (H (2,58) = 5.523, p = 0.007, pFDR = 0.019). In the post-hoc analysis,  
319 both PD-CI and PD-NC patients differed from HS with a higher Th in the alpha band, but only PD-CI  
320 patients differed from the HS in the gamma band, as reported in Fig. 4.

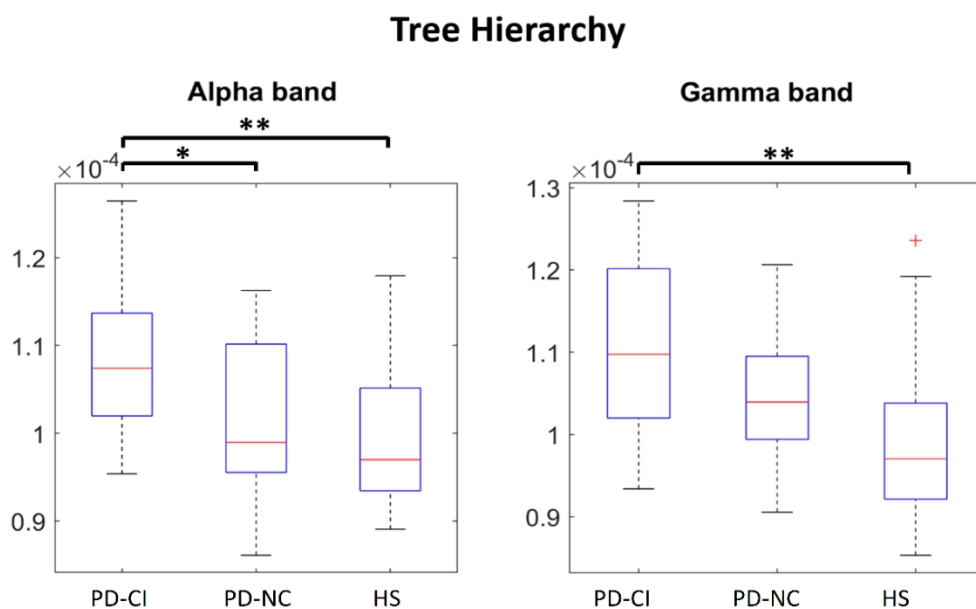

321

322

323

324 **Fig. 4 Differences in Tree Hierarchy parameter among PD-CI, PD-NC and HS**

325 The box plots refer to differences in the Th among respectively PD-CI, PD-NC and HS. The upper  
326 and lower bound of the box refer to the 25<sup>th</sup> to 75<sup>th</sup> percentiles, the median value is represented by  
327 horizontal line inside each box, the whiskers extent to the 10<sup>th</sup> and 90<sup>th</sup> percentiles, and further data  
328 are considered as outliers and represented by the symbol +. The PD-CI group shows a higher Th,  
329 compared to both PD-NC group and HS, in the alpha and gamma bands. \* = p<0.05, \*\* = p<0.01

330

331

332 The diameter was statistically different in the delta band ( $H(2,58) = 4.214, p = 0.019, pFDR$   
333  $= 0.049$ ) among the three groups, and in particular between PD-CI patients and HS, see Fig. 5.

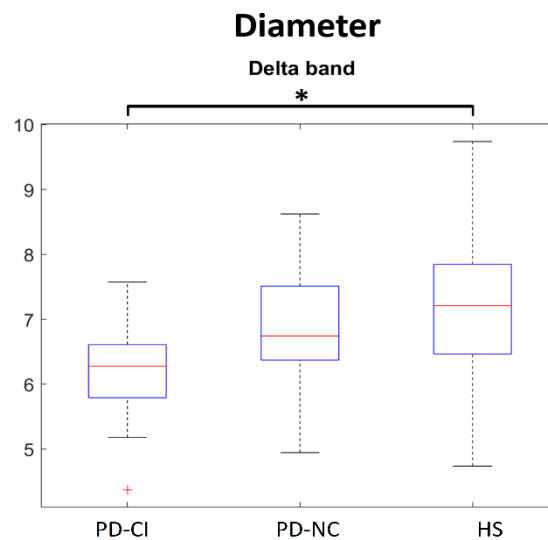

334  
335 **Fig. 5 Differences in Diameter in PD-CI, PD-NC and HS**

336 The box plots refer to differences in the D among respectively PD-CI, PD-NC and HS. The upper  
337 and lower bound of the box refer to the 25<sup>th</sup> to 75<sup>th</sup> percentiles, the median value is represented by  
338 horizontal line inside each box, the whiskers extent to the 10<sup>th</sup> and 90<sup>th</sup> percentiles, and further data  
339 are considered as outliers and represented by the symbol +. PD-CI group shows a statistically  
340 significant lower Diameter compared to both PD-NC group and HS, in delta band. \* =  $p < 0.05$

341  
342 However, it is to be noted that, although most of the parameters in the PD-NC group did not  
343 reach statistical significance, a trend seems evident nonetheless, such that cognitively unimpaired  
344 patients show intermediate values between healthy controls and cognitively compromised patients.  
345 No statically significant difference was found among the three groups in the K, the other global  
346 topological parameters calculated, and in the centrality parameters.

347  
348 *Correlations analysis*

349 As shown in Fig. 6, we found a statistically significant correlation between the MoCA total  
350 score and both the Diameter in delta band ( $R = 0.352, p = 0.028$ ), and the Tree Hierarchy in the  
351 alpha band ( $R = -0.374, p = 0.019$ ). No other statistically significant correlation between connectivity  
352 metrics and clinical scales was found.

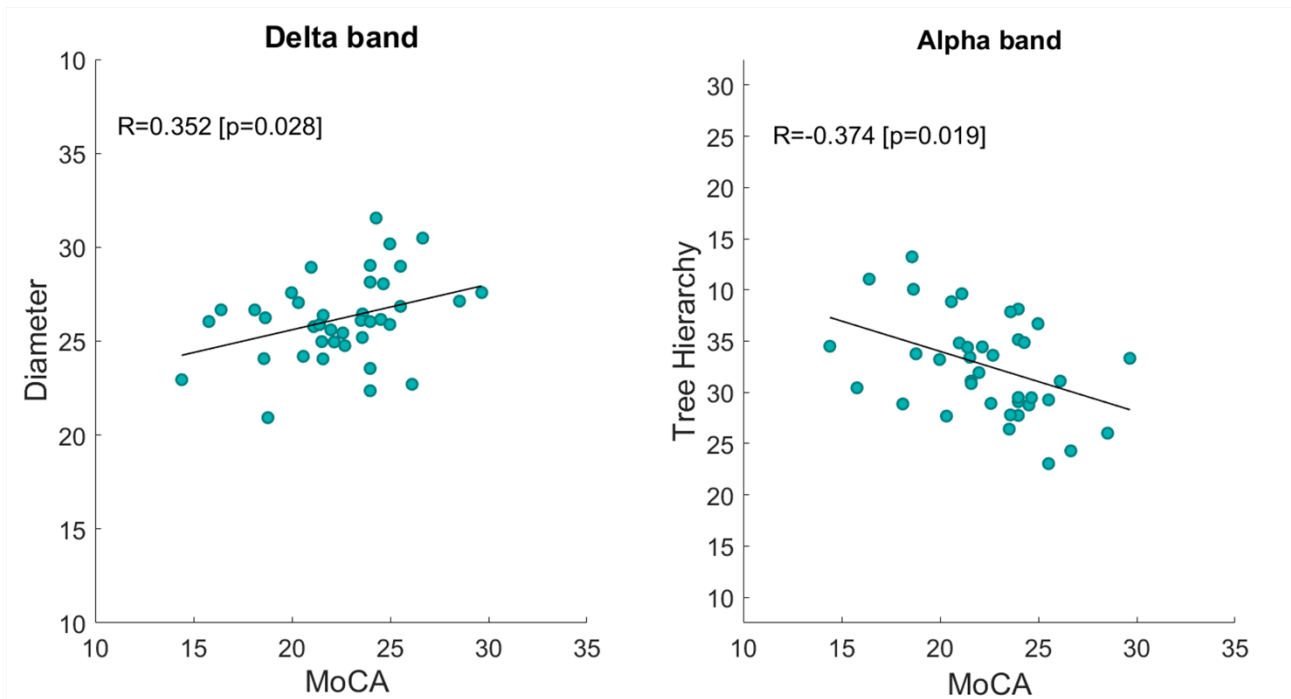

353

354

355 **Fig. 6 Spearman's rank correlation coefficient**

356 MoCa test correlates positively with the Diameter ( $R = 0.352$ ,  $p = 0.028$ ) and negatively with the Tree  
357 Hierarchy ( $R = 0.374$ ,  $p = 0.019$ ).

358

359

## 360 Discussion

361 Our study was designed to test the hypothesis that the cognitive decline observed in PD  
362 patients may be associated to specific changes of both functional connectivity and brain topology.  
363 Furthermore, we hypothesized that the extent of brain network alterations may be correlated with  
364 the cognitive outcome. By applying the PLM, a connectivity metric that measures the synchronization  
365 between brain regions, (Baselice et al., 2019) to MEG signals, we were able to highlight differences  
366 in the global and nodal PLM values in PD-CI as compared to both PD-NC and HS. Furthermore,  
367 using graph analysis, we found specific PD-related changes in brain network topology which were  
368 related to cognitive functioning.

369

370 *Functional connectivity*



371 We found that the global PLM value in the gamma band was significantly reduced in PD-CI  
372 patients as compared to HS. This measure, obtained by averaging over all 90 (one for each ROI)  
373 nodal PLM values, is a measure of global functional connectivity. Interestingly, the global PLM of  
374 PD-NC patients was intermediate between that of HS and PD-CI (although the difference was not  
375 statistically significant).

376 The nodal PLM values showed a similar trend to that of the global PLM. For example, the  
377 nodal PLM of cognitively PD-NC patients was intermediate between PD-CI patients and HS in the  
378 gamma band. Specifically, a statically significant reduction of the functional connectivity was  
379 observed in several temporal (fusiform gyrus, Heschl's gyrus and inferior temporal gyrus), parietal  
380 (postcentral gyrus), and occipital (lingual gyrus) areas within the left hemisphere, as compared to  
381 HS. Moreover, the PLM of the lingual and fusiform left gyri was significantly reduced with respect to  
382 the HS in both PD-CI and PD-NC patients (Fig. 2).

383 The heterogeneity of the clinical onset, the prognostic evolution as well as the response to  
384 dopaminergic therapy suggest the existence of two distinct cognitive syndromes in PD (although with  
385 overlapping elements), namely the frontostriatal syndrome (Tessitore et al., 2012b) and the posterior  
386 cortical syndrome (Baggio et al., 2015; Tremblay et al., 2013). The former is cognitively characterized  
387 mainly by dysexecutive disorders, and is strictly related to the dopaminergic imbalance (Gotham et  
388 al., 1986), while in the latter, memory deficit, visuospatial/visuoperceptual disturbances and more  
389 generally global cognitive decline are frequently observed (Williams-Gray et al., 2009). Importantly,  
390 the posterior cortical syndrome is associated with a worse cognitive prognosis (Kehagia et al., 2010).  
391 Overall, our results are in line with this view, where the form presenting the greater risk of developing  
392 dementia (Olde Dubbelink et al., 2014) showed widespread functional connectivity in temporal,  
393 parietal and occipital regions (Baggio et al., 2015). Interestingly, cortical areas showing reduced  
394 synchronization in cognitively impaired PD subjects (i.e. fusiform gyrus, Heschl's gyrus, inferior  
395 temporal gyrus, postcentral gyrus, and lingual gyrus) are mainly involved in the posterior cortical  
396 syndrome.

397 Taking into account the clinical evidence suggesting that damage in such regions leads to  
398 severe cognitive impairment with a high risk of developing dementia, we might speculate that, if

399 these regions are less integrated with the rest of the brain, then the cognitive functioning might be  
400 impaired. This is also supported by our correlation analysis, showing that the less is the  
401 synchronization between these areas and the rest of the brain, the worst the cognitive performance.  
402 It is important to note that there was a clear downward trend between HS and all PD in both global  
403 and nodal PLM values, with PD-NC group always displaying intermediate values. This observation  
404 could suggest that the reduction of the functional connectivity in terms of reduced overall  
405 synchronization (estimated by the PLM) progresses till to exceed a threshold, the cognitive  
406 impairment acquires clinical significance (Sorrentino et al., 2020). It is even more interesting to  
407 observe that the reduction in synchronization in the posterior regions (along with the cognitive  
408 impairment), is not a function of disease progression or severity, as documented by the comparison  
409 of the clinical scales between the two PD groups.

410 Finally, it is worth noting that all these results are in the gamma band (30-48 Hz), which has  
411 been related to visual perception, attention, auditory processing, learning and memory  
412 (Hoogenboom et al., 2006; Kaiser and Lutzenberger, 2005). Interestingly, dopamine agonists have  
413 been shown to increase gamma-band activity in both cortical and subcortical networks (Brown,  
414 2003).

415

#### 416 *Brain network topology*

417 The reduction of functional connectivity in PD patients is linked to changes in the large-scale  
418 functional organization of the brain, as captured by our topological network results. With regard to  
419 the centrality parameters (degree and betweenness centrality), which evaluate the topological  
420 characteristic of each single region, we did not find any statistically significant difference among the  
421 three groups. However, with regard to the global parameters, expressing global topological features  
422 of the brain network, PD-CI patients, as compared to HS and PD-NC patients, showed widespread  
423 differences in multi frequencies bands (delta, alpha, gamma) in the Lf, Th (both higher in PD-CI) and  
424 Diameter (lower in PD-CI) (Fig. 3, 4 and 5).

425 It should be noted that, similarly to the functional connectivity, PD-NC group shows an  
426 intermediate profile between HS and PD-CI, even when the difference does not reach statistical  
427 significance (see Fig. 4).

428 The  $L_f$  is defined as the ratio between the number of leaf nodes (nodes with degree = 1) and  
429 the maximum possible number of links (total number of nodes minus 1). A  $L_f$  equal to 1 indicates a  
430 network with a star-like topology (Tewarie et al., 2015), where each couple of nodes is topologically  
431 closer, and most shortest path pass on a small subset of highly-important nodes. On the contrary, a  
432  $L_f$  equal to 0 signifies a line-like network, which is less reliant on any singly node, and hence with  
433 higher resiliency to targeted attacks (Rubinov and Sporns, 2010; Tononi et al., 1994). Related to the  
434  $L_f$ , the Diameter provides information about the distance between all pairs of nodes. In fact, lower  
435 Diameter, as showed by PD patients in the delta band, is indicating a more compact, star-like network  
436 (Boersma et al., 2013). Finally, the tree hierarchy quantifies the trade-off between efficient  
437 communication (large-scale integration) and prevention of the overload of the most important nodes.  
438 A higher tree hierarchy, as found in PD-CI, may suggests a sub-optimal balance, with respect to both  
439 PD-NC (in the alpha band) and HS (in the alpha and the gamma band), in the sense that, in  
440 pathology, the network integration becomes reliant on a small subset of important areas, hence  
441 losing resiliency. This mechanism might underlie the reduction of functional connectivity found in  
442 some brain areas (see Fig 1 and 2) linked to cognitive deterioration.

443

#### 444 *Correlation analysis*

445 Interestingly, as reported in Fig. 7, we found statistically significant correlation between the  
446 MoCA test and both the Diameter in delta band (direct correlation) and the Tree Hierarchy in the  
447 alpha band (inverse correlation). These correlations are in line with our findings and support the  
448 hypothesis of reduced synchronization in some brain areas, as well as hyperconnected network  
449 topology, that might capture sub-optimal large-scale functional organization underpinning cognitive  
450 impairment development in PD patients.

451

#### 452 **Conclusion**

453           In conclusion, in this work, we show that in PD patients in the early phase of the disease,  
454 the functional connectivity changes, as well as the topological rearrangements within the large-scale  
455 functional networks, are correlated to cognitive impairment. In particular, we found reduced  
456 functional connectivity in PD-CI (with respect to both PD-NC and HS) in terms of reduced overall  
457 synchronization, as estimated by the PLM, as well as specifically in the posterior hubs. Furthermore,  
458 analyzing the brain networks, we found a more star-like topology in PD-CI.

459           It is noteworthy to observe that both PD groups (i.e. PD-CI and the PD-NC group) did not  
460 differ with regard to the disease stage as well as to the motor impairment. Nonetheless, the group  
461 affected by earlier development of cognitive impairment was the one showing reduced  
462 synchronization in the posterior areas. These data are in line with the hypothesis that two distinct  
463 clinical phenotypes (although with overlapping elements) exist and that involvement of the posterior  
464 regions relates to earlier cognitive decline.

465

466

467

468

469

470 **Author contributions**

471 RR collected and acquired the dataset, processed the data and conceptualized the study; ML, ETL  
472 and FB processed the data; AL, RDM and AT collected the sample; CG, LM, GS contributed to  
473 interpreting the results and critically revised the article; PS supervised the study. All authors  
474 interpreted the results and wrote the manuscript.

475

476 **Competing interests statement**

477 The authors declare no competing interests.

478

479 **Data availability**

480 The MEG data and the reconstructed avalanches are available upon reasonable request to the  
481 corresponding author, conditional on appropriate ethics approval at the local site.

482

483 **Funding**

484 This study was funded by University of Naples Parthenope within the Project “Bando Ricerca  
485 Competitiva 2017” (D.R. 289/2017).

486

487

488

489

490

491 **References**

- 492 Aarsland, D., Brønnick, K., Larsen, J.P., Tysnes, O.B., Alves, G., 2009. Cognitive impairment in  
493 incident, untreated Parkinson disease: the Norwegian ParkWest study. *Neurology* 72, 1121–  
494 1126.
- 495 Aarsland, D., Kurz, M.W., 2010. The epidemiology of dementia associated with Parkinson disease.  
496 *J. Neurol. Sci.* 289, 18–22. <https://doi.org/10.1016/j.jns.2009.08.034>
- 497 Amboni, M., Ippariello, L., Iavarone, A., Fasano, A., Palladino, R., Rucco, R., Picillo, M., Lista, I.,  
498 Varriale, P., Vitale, C., 2018. Step length predicts executive dysfunction in Parkinson's  
499 disease: a 3-year prospective study. *J. Neurol.* 1–10.
- 500 Baggio, H.C., Segura, B., Garrido-Millan, J.L., Marti, M.-J., Compta, Y., Valldeoriola, F., Tolosa, E.,  
501 Junque, C., 2015. Resting-state frontostriatal functional connectivity in Parkinson's disease-  
502 related apathy. *Mov. Disord.* 30, 671–9. <https://doi.org/10.1002/mds.26137>
- 503 Baillet, S., 2017. Magnetoencephalography for brain electrophysiology and imaging. *Nat. Neurosci.*  
504 20, 327–339. <https://doi.org/10.1038/nn.4504>
- 505 Barbati, G., Porcaro, C., Zappasodi, F., Rossini, P.M., Tecchio, F., 2004. Optimization of an  
506 independent component analysis approach for artifact identification and removal in  
507 magnetoencephalographic signals. *Clin. Neurophysiol.* 115, 1220–1232.
- 508 Baseline, F., Sorriso, A., Rucco, R., Sorrentino, P., 2019. Phase Linearity Measurement : A Novel  
509 Index for Brain Functional Connectivity. *IEEE Trans. Med. Imaging* 38, 873–882.  
510 <https://doi.org/10.1109/TMI.2018.2873423>
- 511 Beck, A.T., Ward, C.H., Mendelson, M., Mock, J., Erbaugh, J., 1961. An inventory for measuring  
512 depression. *Arch. Gen. Psychiatry* 4, 561–571.
- 513 Benjamini, Y., Hochberg, Y., 1995. Controlling the False Discovery Rate: A Practical and Powerful  
514 Approach to Multiple Testing. *Source J. R. Stat. Soc. Ser. B J. R. Stat. Soc. Ser. B J. R. Stat.*  
515 *Soc. B* 57, 289–300. <https://doi.org/10.2307/2346101>
- 516 Boersma, M., Smit, D.J.A., Boomsma, D.I., De Geus, E.J.C., Delemarre-van de Waal, H.A., Stam,  
517 C.J., 2013. Growing Trees in Child Brains: Graph Theoretical Analysis of  
518 Electroencephalography-Derived Minimum Spanning Tree in 5- and 7-Year-Old Children  
519 Reflects Brain Maturation. *Brain Connect.* 3, 50–60. <https://doi.org/10.1089/brain.2012.0106>
- 520 Bosboom, J.L.W., Stoffers, D., Stam, C.J., van Dijk, B.W., Verbunt, J., Berendse, H.W., Wolters,  
521 E.C., 2006. Resting state oscillatory brain dynamics in Parkinson's disease: An MEG study.  
522 *Clin. Neurophysiol.* 117, 2521–2531. <https://doi.org/10.1016/j.clinph.2006.06.720>
- 523 Braak, H., Del Tredici, K., Rüb, U., De Vos, R.A.I., Jansen Steur, E.N.H., Braak, E., 2003. Staging  
524 of brain pathology related to sporadic Parkinson's disease. *Neurobiol. Aging* 24, 197–211.  
525 [https://doi.org/10.1016/S0197-4580\(02\)00065-9](https://doi.org/10.1016/S0197-4580(02)00065-9)
- 526 Brown, P., 2003. Oscillatory nature of human basal ganglia activity: relationship to the  
527 pathophysiology of Parkinson's disease. *Mov. Disord. Off. J. Mov. Disord. Soc.* 18, 357–363.
- 528 Buzsáki, G., Draguhn, A., 2004. Neuronal oscillations in cortical networks. *Science (80-. )*. 304,  
529 1926–1929. <https://doi.org/10.1126/science.1099745>
- 530 Conti, S., Bonazzi, S., Laiaccona, M., Masina, M., Coralli, M.V., 2015. Montreal Cognitive  
531 Assessment (MoCA)-Italian version: regression based norms and equivalent scores. *Neurol.*  
532 *Sci.* 36, 209–214.
- 533 de Cheveigné, A., Simon, J.Z., 2007. Denoising based on time-shift PCA. *J. Neurosci. Methods*  
534 165, 297–305. <https://doi.org/10.1016/j.jneumeth.2007.06.003>
- 535 Dubbelink, K.T.E.O., Stoffers, D., Deijlen, J.B., Twisk, J.W.R., Stam, C.J., Berendse, H.W., 2013.  
536 Cognitive decline in Parkinson's disease is associated with slowing of resting-state brain  
537 activity: a longitudinal study. *Neurobiol. Aging* 34, 408–418.
- 538 Emre, M., Aarsland, D., Brown, R., Burn, D.J., Duyckaerts, C., Mizuno, Y., Broe, G.A., Cummings,  
539 J., Dickson, D.W., Gauthier, S., Goldman, J., Goetz, C., Korczyn, A., Lees, A., Levy, R.,  
540 Litvan, I., McKeith, I., Olanow, W., Poewe, W., Quinn, N., Sampaio, C., Tolosa, E., Dubois, B.,  
541 2007. Clinical diagnostic criteria for dementia associated with Parkinson's disease. *Mov.*  
542 *Disord.* 22, 1689–1707. <https://doi.org/10.1002/mds.21507>
- 543 Fahn, S., 1987. Unified Parkinson's Disease Rating Scale. *Recent Dev. Park. Dis.*
- 544 Freeman, L.C., 1977. A Set of Measures of Centrality Based on Betweenness. *Sociometry* 40, 35.  
545 <https://doi.org/10.2307/3033543>



- 546 Gibb, W.R., Lees, A.J., 1988. A comparison of clinical and pathological features of young- and old-  
547 onset Parkinson's disease. *Neurology* 38, 1402–6. <https://doi.org/10.1212/wnl.38.9.1402>
- 548 Gong, G., He, Y., Concha, L., Lebel, C., Gross, D.W., Evans, A.C., Beaulieu, C., 2009. Mapping  
549 anatomical connectivity patterns of human cerebral cortex using in vivo diffusion tensor  
550 imaging tractography. *Cereb. Cortex* 19, 524–36. <https://doi.org/10.1093/cercor/bhn102>
- 551 Gotham, A.-M., Brown, R.G., Marsden, C.D., 1986. Levodopa treatment may benefit or impair"  
552 frontal" function in Parkinson's disease. *Lancet* 328, 970–971.
- 553 Gross, J., Baillet, S., Barnes, G.R., Henson, R.N., Hillebrand, A., Jensen, O., Jerbi, K., Litvak, V.,  
554 Maess, B., Oostenveld, R., Parkkonen, L., Taylor, J.R., van Wassenhove, V., Wibral, M.,  
555 Schoffelen, J.-M., 2013. Good practice for conducting and reporting MEG research.  
556 *Neuroimage* 65, 349–63. <https://doi.org/10.1016/j.neuroimage.2012.10.001>
- 557 Hoehn, M.M., Yahr, M.D., 1967. Parkinsonism: onset, progression, and mortality. *Neurology* 17,  
558 427–427. <https://doi.org/10.1212/WNL.17.5.427>
- 559 Hoogenboom, N., Schoffelen, J.-M., Oostenveld, R., Parkes, L.M., Fries, P., 2006. Localizing  
560 human visual gamma-band activity in frequency, time and space. *Neuroimage* 29, 764–773.  
561 <https://doi.org/https://doi.org/10.1016/j.neuroimage.2005.08.043>
- 562 Jacini, F., Sorrentino, P., Lardone, A., Rucco, R., Baselice, F., Cavaliere, C., Aiello, M., Orsini, M.,  
563 Iavarone, A., Manzo, V., 2018. Amnesic Mild Cognitive Impairment Is Associated With  
564 Frequency-Specific Brain Network Alterations in Temporal Poles. *Front. Aging Neurosci.* 10,  
565 400.
- 566 Kaiser, J., Lutzenberger, W., 2005. Human gamma-band activity: a window to cognitive  
567 processing. *Neuroreport* 16, 207–211.
- 568 Kehagia, A.A., Barker, R.A., Robbins, T.W., 2010. Neuropsychological and clinical heterogeneity of  
569 cognitive impairment and dementia in patients with Parkinson's disease. *Lancet Neurol.* 9,  
570 1200–1213.
- 571 Lardone, A., Liparoti, M., Sorrentino, P., Rucco, R., Jacini, F., Polverino, A., Minino, R., Pesoli, M.,  
572 Baselice, F., Sorriso, A., 2018. Mindfulness meditation is related to long-lasting changes in  
573 hippocampal functional topology during resting state: a magnetoencephalography study.  
574 *Neural Plast.* 2018.
- 575 Lopes da Silva, F., 2013. EEG and MEG: Relevance to neuroscience. *Neuron* 80, 1112–1128.  
576 <https://doi.org/10.1016/j.neuron.2013.10.017>
- 577 Marin, R.S., Biedrzycki, R.C., Firinciogullari, S., 1991. Reliability and validity of the Apathy  
578 Evaluation Scale. *Psychiatry Res.* 38, 143–162.
- 579 Nasreddine, Z.S., Phillips, N.A., BÃ©dirian, V., Charbonneau, S., Whitehead, V., Collin, I.,  
580 Cummings, J.L., Chertkow, H., 2005. The Montreal Cognitive Assessment, MoCA: A Brief  
581 Screening Tool For Mild Cognitive Impairment. *J. Am. Geriatr. Soc.* 53, 695–699.  
582 <https://doi.org/10.1111/j.1532-5415.2005.53221.x>
- 583 Nolte, G., 2003. The magnetic lead field theorem in the quasi-static approximation and its use for  
584 magnetoencephalography forward calculation in realistic volume conductors. *Phys. Med. Biol.*  
585 48, 3637–3652. <https://doi.org/10.1088/0031-9155/48/22/002>
- 586 Olde Dubbelink, K.T.E., Hillebrand, A., Stoffers, D., Deijen, J.B., Twisk, J.W.R., Stam, C.J.,  
587 Berendse, H.W., 2014. Disrupted brain network topology in Parkinson's disease: A  
588 longitudinal magnetoencephalography study. *Brain* 137, 197–207.  
589 <https://doi.org/10.1093/brain/awt316>
- 590 Oostenveld, R., Fries, P., Maris, E., Schoffelen, J.-M., 2011. FieldTrip: open source software for  
591 advanced analysis of MEG, EEG, and invasive electrophysiological data. *Comput. Intell.*  
592 *Neurosci.* 2011, 1.
- 593 P.K. Sadasivan, D.N., 1996. SVD based technique for noise reduction in electroencephalographic  
594 signals. *Signal Processing* 55, 179–189. [https://doi.org/10.1016/S0165-1684\(96\)00129-6](https://doi.org/10.1016/S0165-1684(96)00129-6)
- 595 Pievani, M., Filippini, N., Van Den Heuvel, M.P., Cappa, S.F., Frisoni, G.B., 2014. Brain  
596 connectivity in neurodegenerative diseases - From phenotype to proteinopathy. *Nat. Rev.*  
597 *Neurol.* 10, 620–633. <https://doi.org/10.1038/nrneurol.2014.178>
- 598 Roth, M., Tym, E., Mountjoy, C.Q., Huppert, F.A., Hendrie, H., Verma, S., Goddard, R., 1986.  
599 CAMDEX: a standardised instrument for the diagnosis of mental disorder in the elderly with  
600 special reference to the early detection of dementia. *Br. J. psychiatry* 149, 698–709.

- 601 Rubinov, M., Sporns, O., 2010. Complex network measures of brain connectivity: Uses and  
602 interpretations. *Neuroimage* 52, 1059–1069.  
603 <https://doi.org/10.1016/j.neuroimage.2009.10.003>
- 604 Rucco, R., Liparoti, M., Jacini, F., Baselice, F., Antenora, A., De Michele, G., Criscuolo, C.,  
605 Vettoliere, A., Mandolesi, L., Sorrentino, G., 2019. Mutations in the SPAST gene causing  
606 hereditary spastic paraplegia are related to global topological alterations in brain functional  
607 networks. *Neurol. Sci.* 40, 979–984.
- 608 Singer, W., 1999. Neuronal synchrony: A versatile code for the definition of relations? *Neuron* 24,  
609 49–65. [https://doi.org/10.1016/S0896-6273\(00\)80821-1](https://doi.org/10.1016/S0896-6273(00)80821-1)
- 610 Sorrentino, P., Nieboer, D., Twisk, J.W.R., Stam, C.J., Douw, L., Hillebrand, A., 2017. The  
611 Hierarchy of Brain Networks Is Related to Insulin Growth Factor-1 in a Large, Middle-Aged,  
612 Healthy Cohort: An Exploratory Magnetoencephalography Study. *Brain Connect.* 7.  
613 <https://doi.org/10.1089/brain.2016.0469>
- 614 Sorrentino, P., Rucco, R., Baselice, F., De Micco, R., Tessitore, A., Hillebrand, A., Mandolesi, L.,  
615 Breakspear, M., Gollo, L.L., Sorrentino, G., 2020. Extensive functional repertoire underpins  
616 complex behaviours: insights from Parkinson's disease. *bioRxiv* 823849.
- 617 Sorrentino, P., Rucco, R., Jacini, F., Trojsi, F., Lardone, A., Fabio, B., Femiano, C., Santangelo,  
618 G., Granata, C., Vettoliere, A., Monsurrò, M.R., Tedeschi, G., Sorrentino, G., 2018. Brain  
619 functional networks become more connected as amyotrophic lateral sclerosis progresses: a  
620 source level magnetoencephalographic study. *NeuroImage Clin.* 20, 564–571.  
621 <https://doi.org/10.1016/j.nicl.2018.08.001>
- 622 Sporns, O., Tononi, G., Kötter, R., 2005. The human connectome: A structural description of the  
623 human brain. *PLoS Comput. Biol.* <https://doi.org/10.1371/journal.pcbi.0010042>
- 624 Stam, C.J., Tewarie, P., Van Dellen, E., van Straaten, E.C.W., Hillebrand, A., Van Mieghem, P.,  
625 2014. The trees and the forest: Characterization of complex brain networks with minimum  
626 spanning trees. *Int. J. Psychophysiol.* 92, 129–38.  
627 <https://doi.org/10.1016/j.ijpsycho.2014.04.001>
- 628 Stoffers, D., Bosboom, J.L.W., Deijen, J.B., Wolters, E.C., Berendse, H.W., Stam, C.J., 2007.  
629 Slowing of oscillatory brain activity is a stable characteristic of Parkinson's disease without  
630 dementia. *Brain* 130, 1847–1860. <https://doi.org/10.1093/brain/awm034>
- 631 Tessitore, A., Amboni, M., Esposito, F., Russo, A., Picillo, M., Marcuccio, L., Pellicchia, M.T.,  
632 Vitale, C., Cirillo, M., Tedeschi, G., Barone, P., 2012a. Resting-state brain connectivity in  
633 patients with Parkinson's disease and freezing of gait. *Park. Relat. Disord.* 18, 781–787.  
634 <https://doi.org/10.1016/j.parkreldis.2012.03.018>
- 635 Tessitore, A., Esposito, F., Vitale, C., Santangelo, G., Amboni, M., Russo, A., Corbo, D., Cirillo, G.,  
636 Barone, P., Tedeschi, G., 2012b. Default-mode network connectivity in cognitively unimpaired  
637 patients with Parkinson disease. *Neurology* 79, 2226–2232.
- 638 Tewarie, P., van Dellen, E., Hillebrand, A., Stam, C.J., 2015. The minimum spanning tree: An  
639 unbiased method for brain network analysis. *Neuroimage* 104, 177–188.  
640 <https://doi.org/10.1016/j.neuroimage.2014.10.015>
- 641 Tomlinson, C.L., Stowe, R., Patel, S., Rick, C., Gray, R., Clarke, C.E., 2010. Systematic review of  
642 levodopa dose equivalency reporting in Parkinson's disease. *Mov. Disord.* 25, 2649–2653.  
643 <https://doi.org/10.1002/mds.23429>
- 644 Tononi, G., Sporns, O., Edelman, G.M., 1994. A measure for brain complexity: relating functional  
645 segregation and integration in the nervous system. *Proc. Natl. Acad. Sci.* 91, 5033–5037.
- 646 Tremblay, C., Achim, A.M., Macoir, J., Monetta, L., 2013. The heterogeneity of cognitive symptoms  
647 in Parkinson's disease: a meta-analysis. *J. Neurol. Neurosurg. Psychiatry* 84, 1265–1272.
- 648 Tzourio-Mazoyer, N., Landeau, B., Papathanassiou, D., Crivello, F., Etard, O., Delcroix, N.,  
649 Mazoyer, B., Joliot, M., 2002. Automated anatomical labeling of activations in SPM using a  
650 macroscopic anatomical parcellation of the MNI MRI single-subject brain. *Neuroimage* 15,  
651 273–89. <https://doi.org/10.1006/nimg.2001.0978>
- 652 Van Veen, B.D., Van Drongelen, W., Yuchtman, M., Suzuki, A., 1997. Localization of Brain  
653 Electrical Activity via Linearly Constrained Minimum Variance Spatial Filtering. *IEEE Trans.*  
654 *Biomed. Eng.* 44.
- 655 Varela, F., Lachaux, J.-P., Rodriguez, E., Martinerie, J., 2001. The brainweb: phase



- 656           synchronization and large-scale integration. *Nat. Rev. Neurosci.* 2, 229.  
657 Vitale, C., Agosti, V., Avella, D., Santangelo, G., Amboni, M., Rucco, R., Barone, P., Corato, F.,  
658 Sorrentino, G., 2012. Effect of Global Postural Rehabilitation program on spatiotemporal gait  
659 parameters of parkinsonian patients: A three-dimensional motion analysis study. *Neurol. Sci.*  
660 33, 1337–1343. <https://doi.org/10.1007/s10072-012-1202-y>  
661 Walshe, F.M.R., 1961. Contributions of John Hughlings Jackson to neurology: A brief introduction  
662 to his teachings. *Arch. Neurol.* 5, 119–131.  
663 Williams-Gray, C.H., Evans, J.R., Goris, A., Foltynie, T., Ban, M., Robbins, T.W., Brayne, C.,  
664 Kolachana, B.S., Weinberger, D.R., Sawcer, S.J., 2009. The distinct cognitive syndromes of  
665 Parkinson's disease: 5 year follow-up of the CamPaIGN cohort. *Brain* 132, 2958–2969.  
666

# Gamma band - global PLM

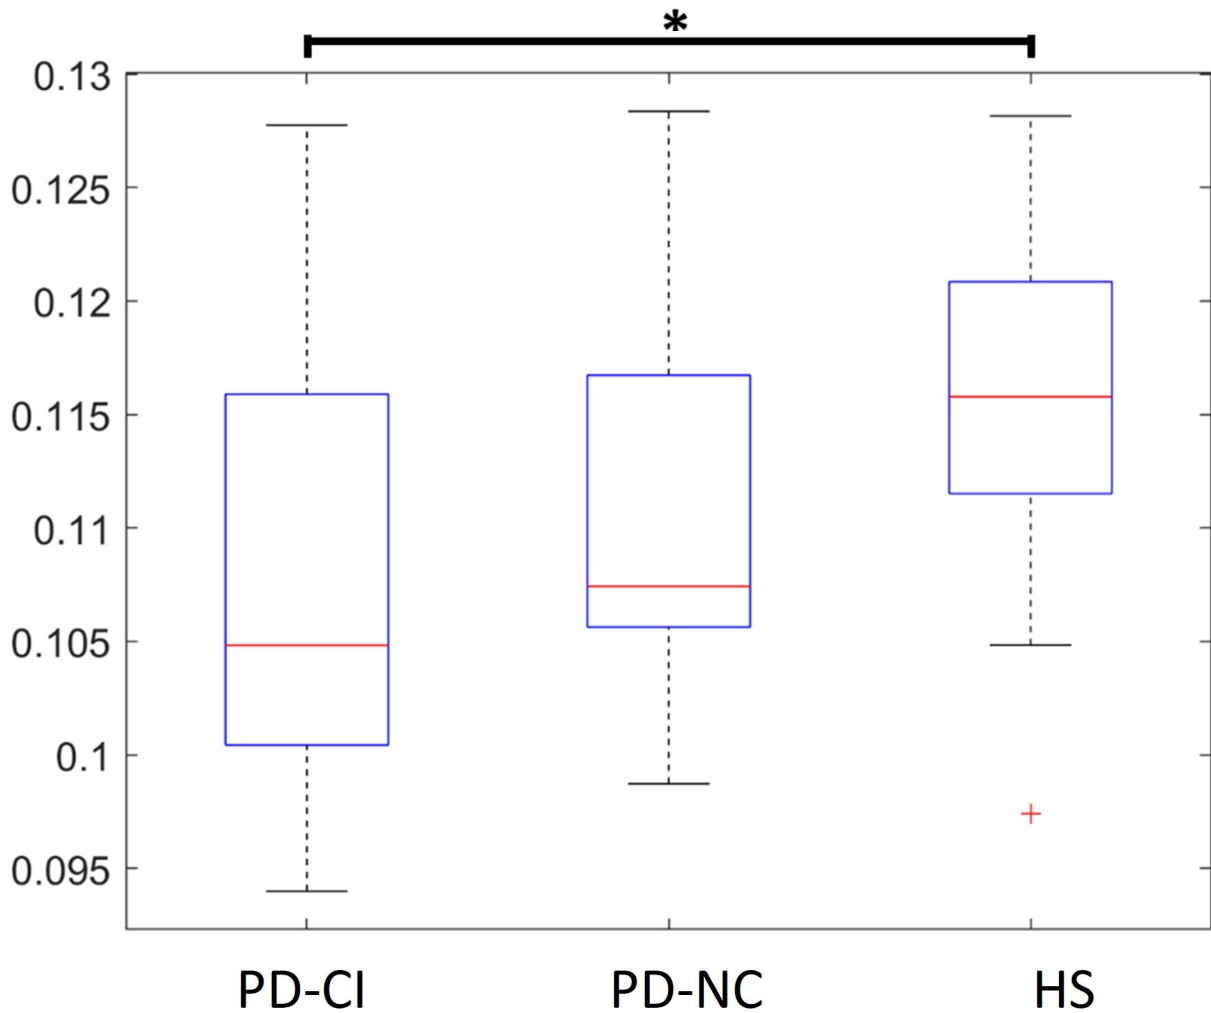

# Gamma band - nodal PLM

## Left Fusiform gyrus

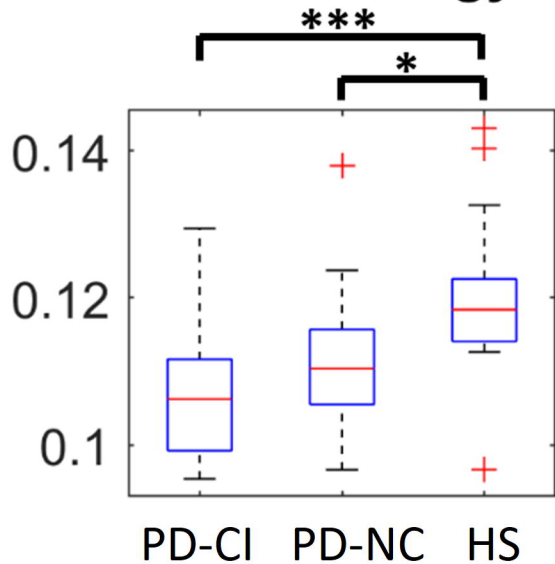

## Left Heschl's gyrus

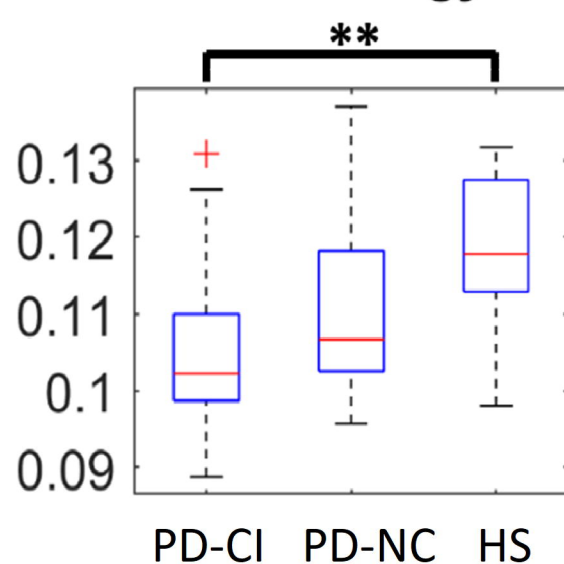

## Left inferior Temporal gyrus

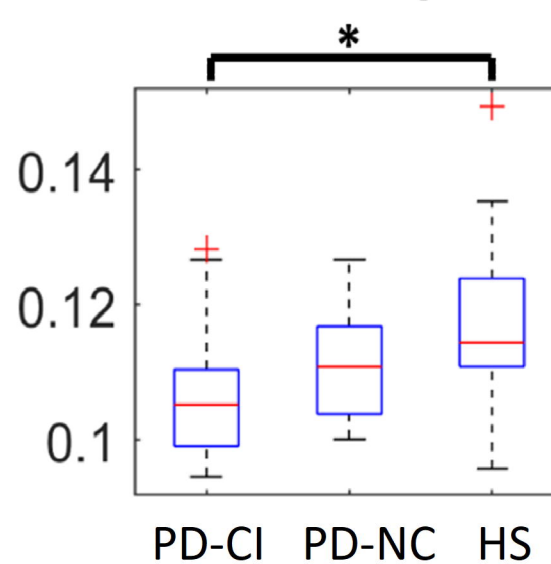

## Left Post-central gyrus

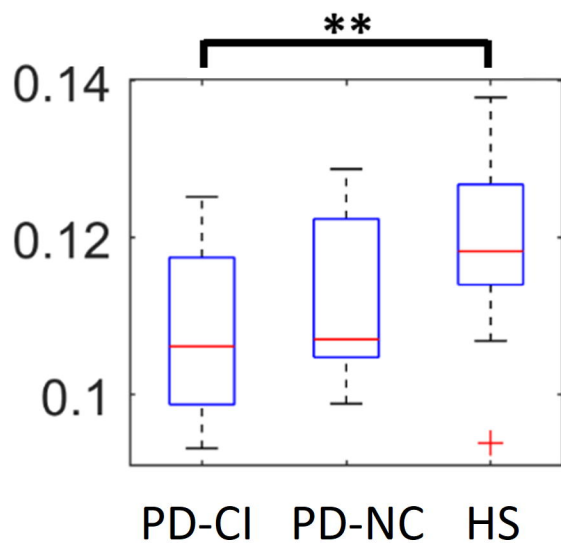

## Left Lingual gyrus

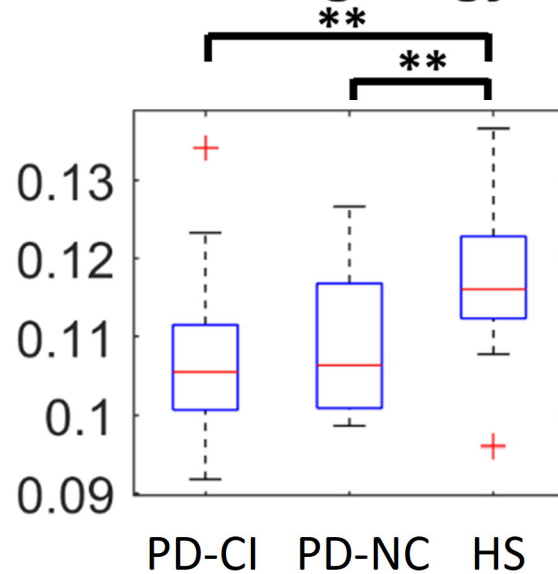

# Leaf fraction

## Delta band

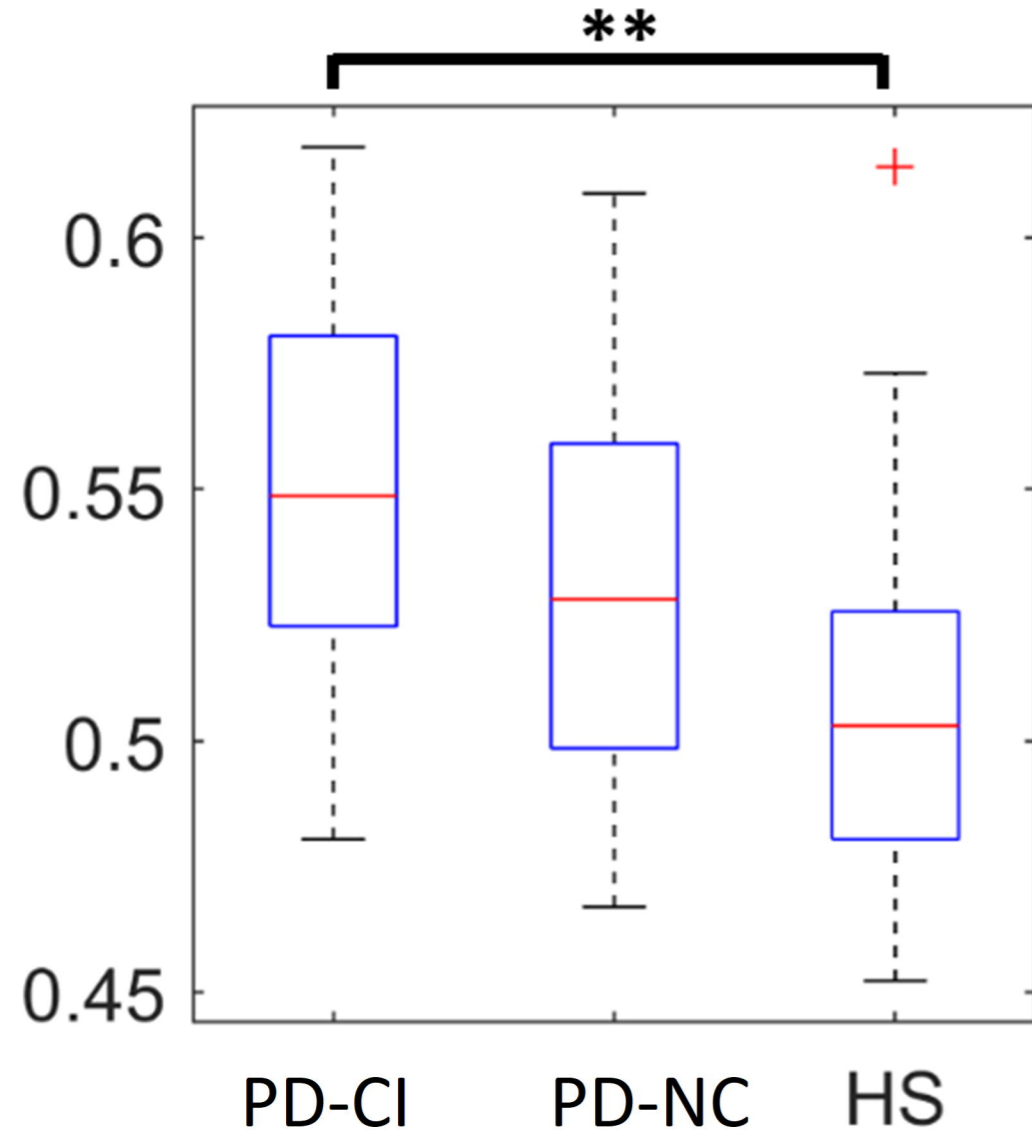

## Alpha band

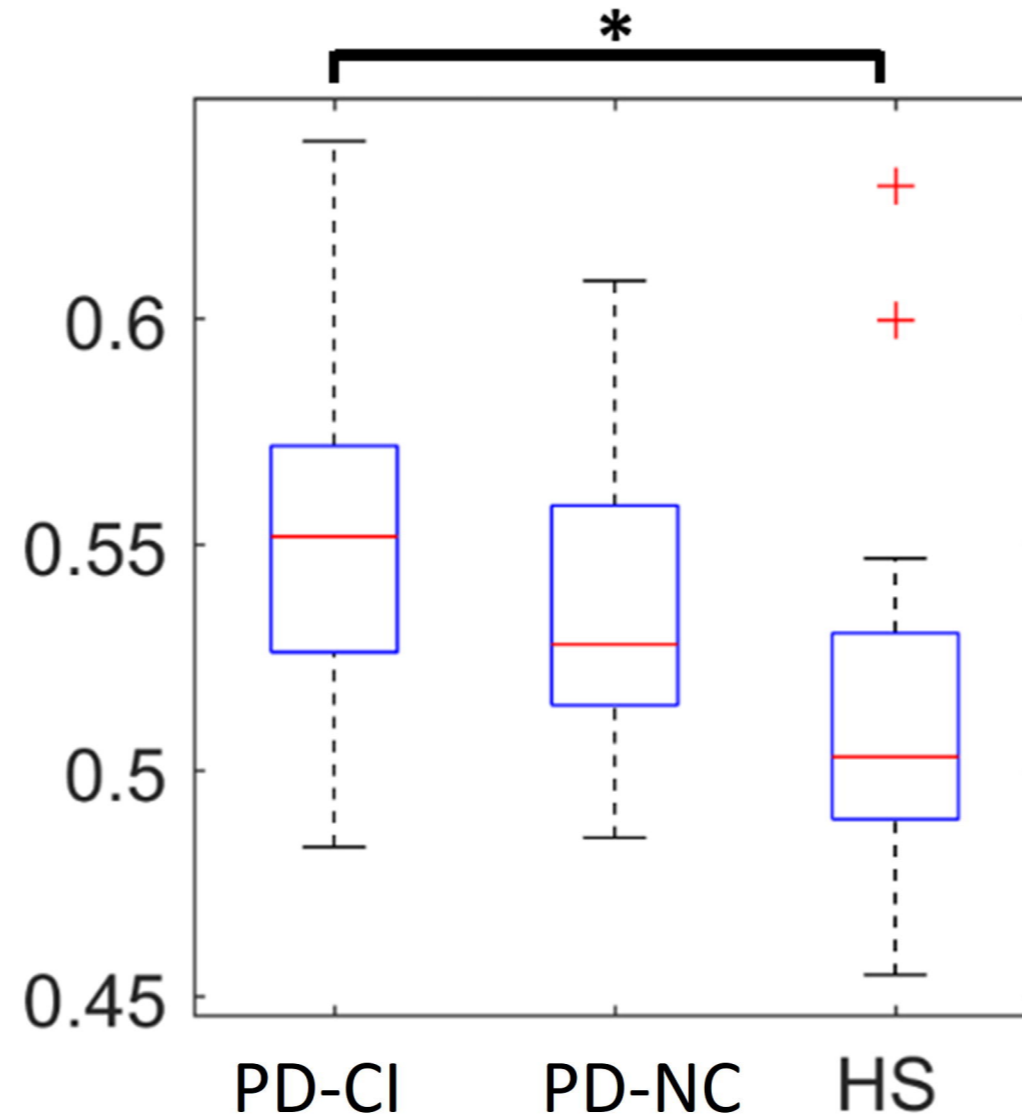

## Gamma band

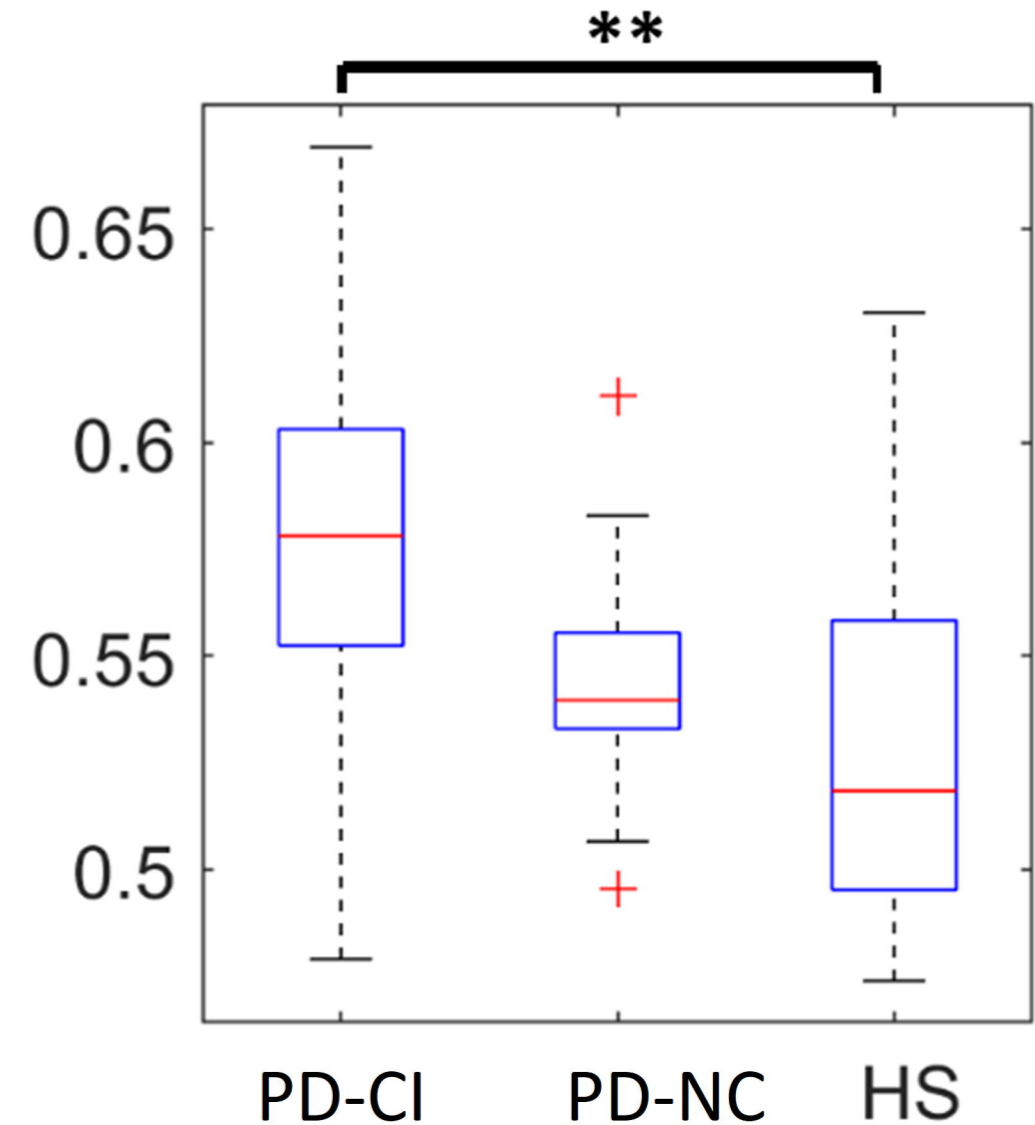

# Tree Hierarchy

## Alpha band

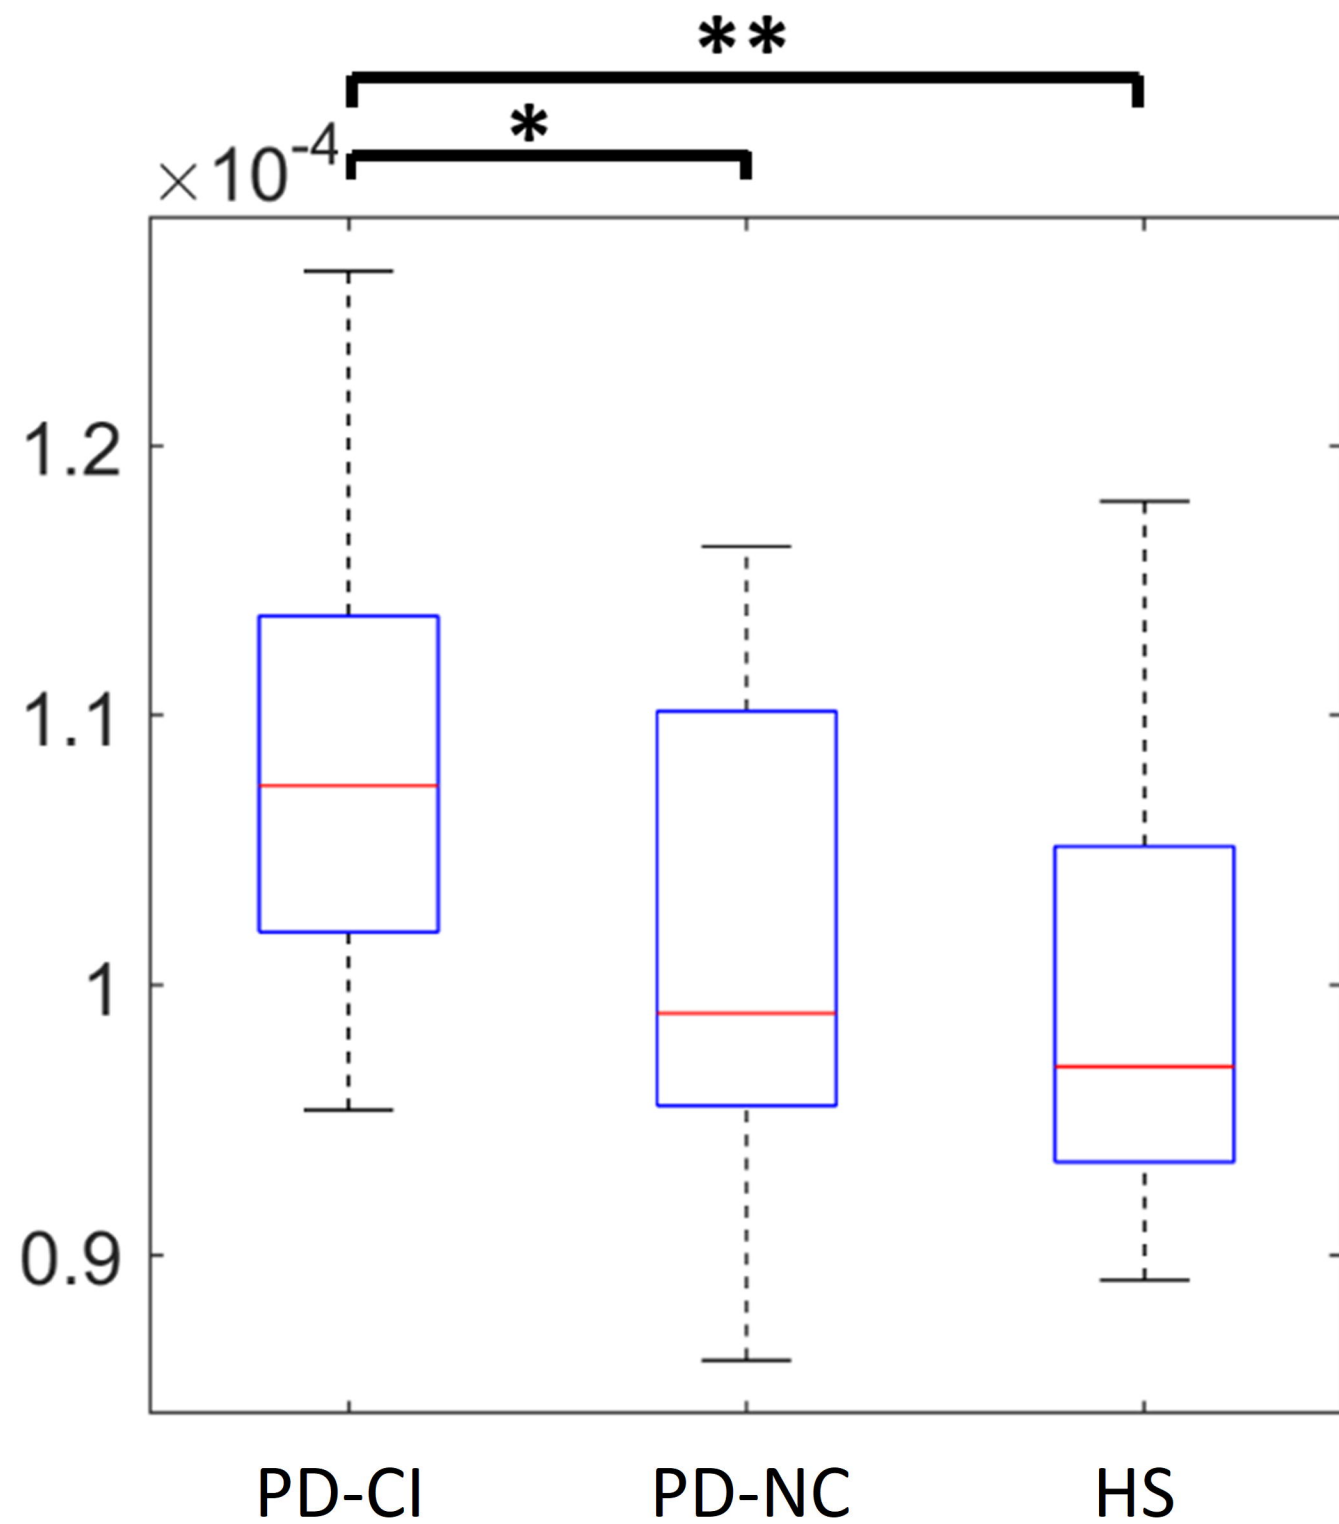

## Gamma band

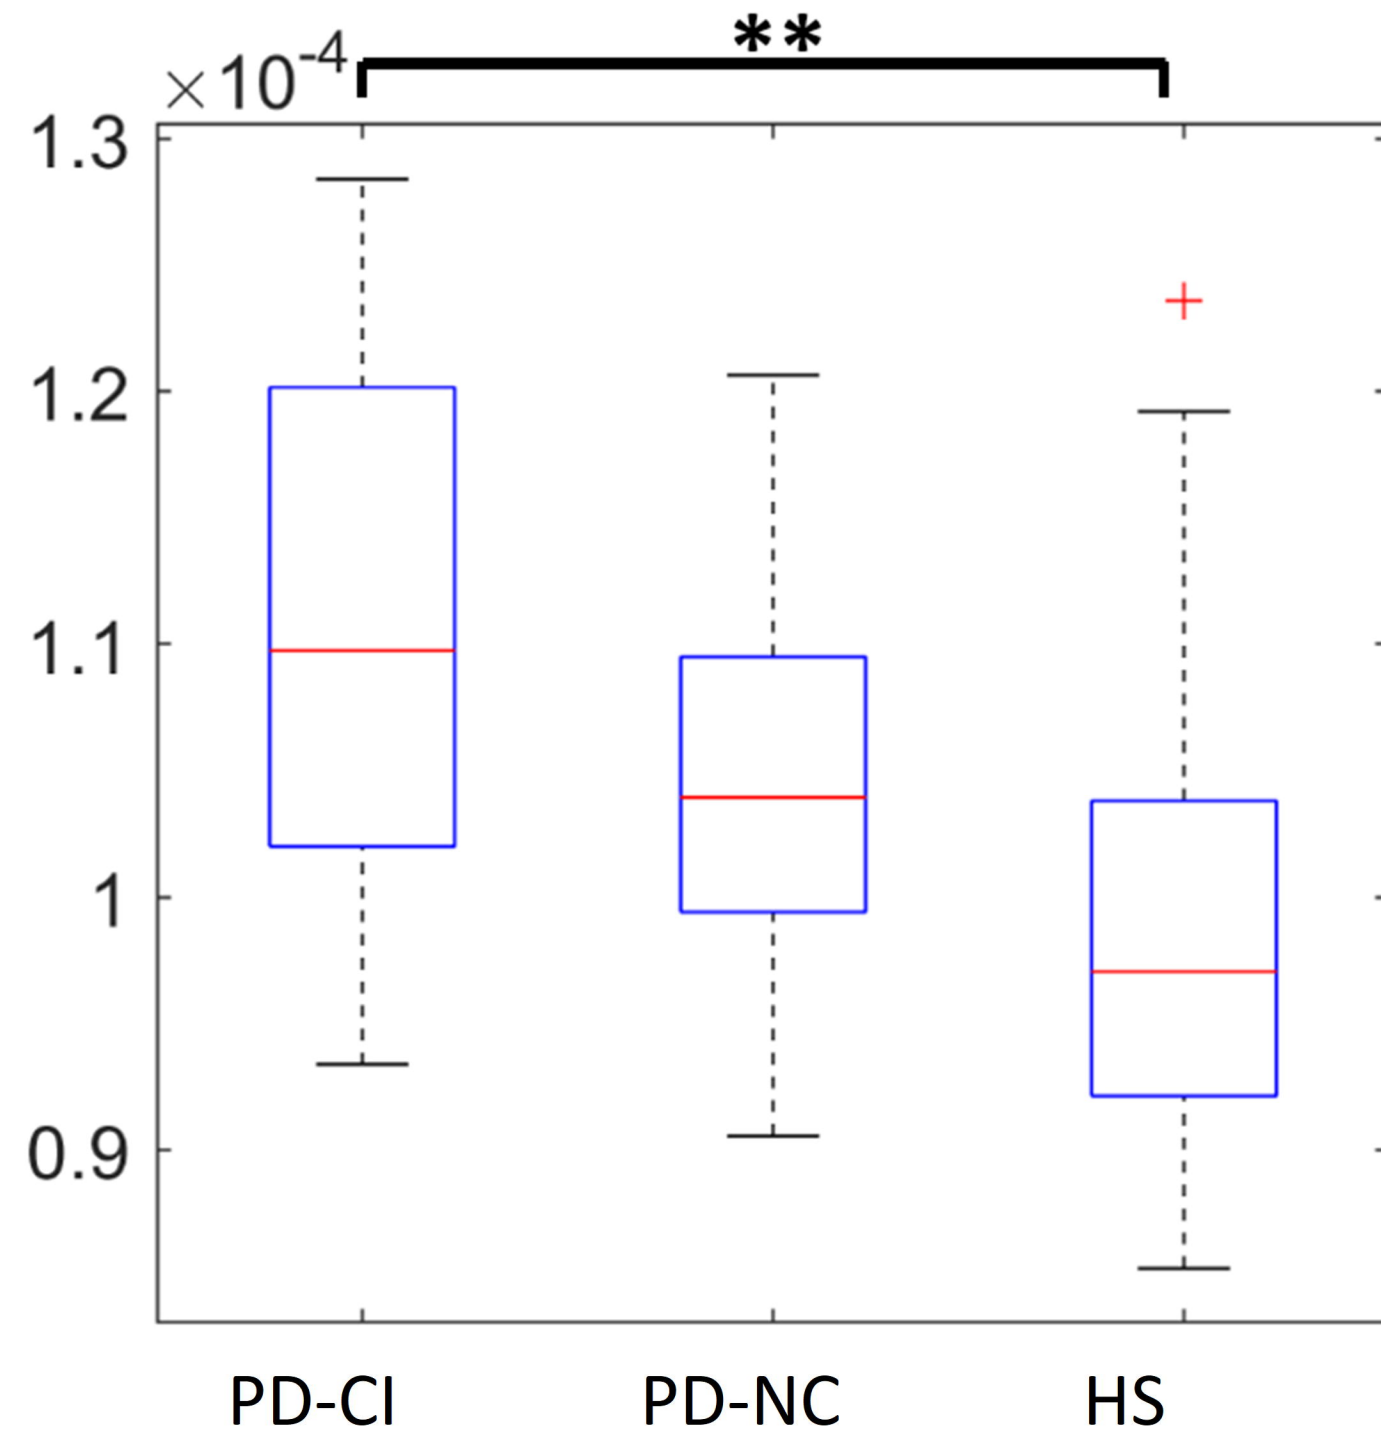

# Diameter

Delta band

\*

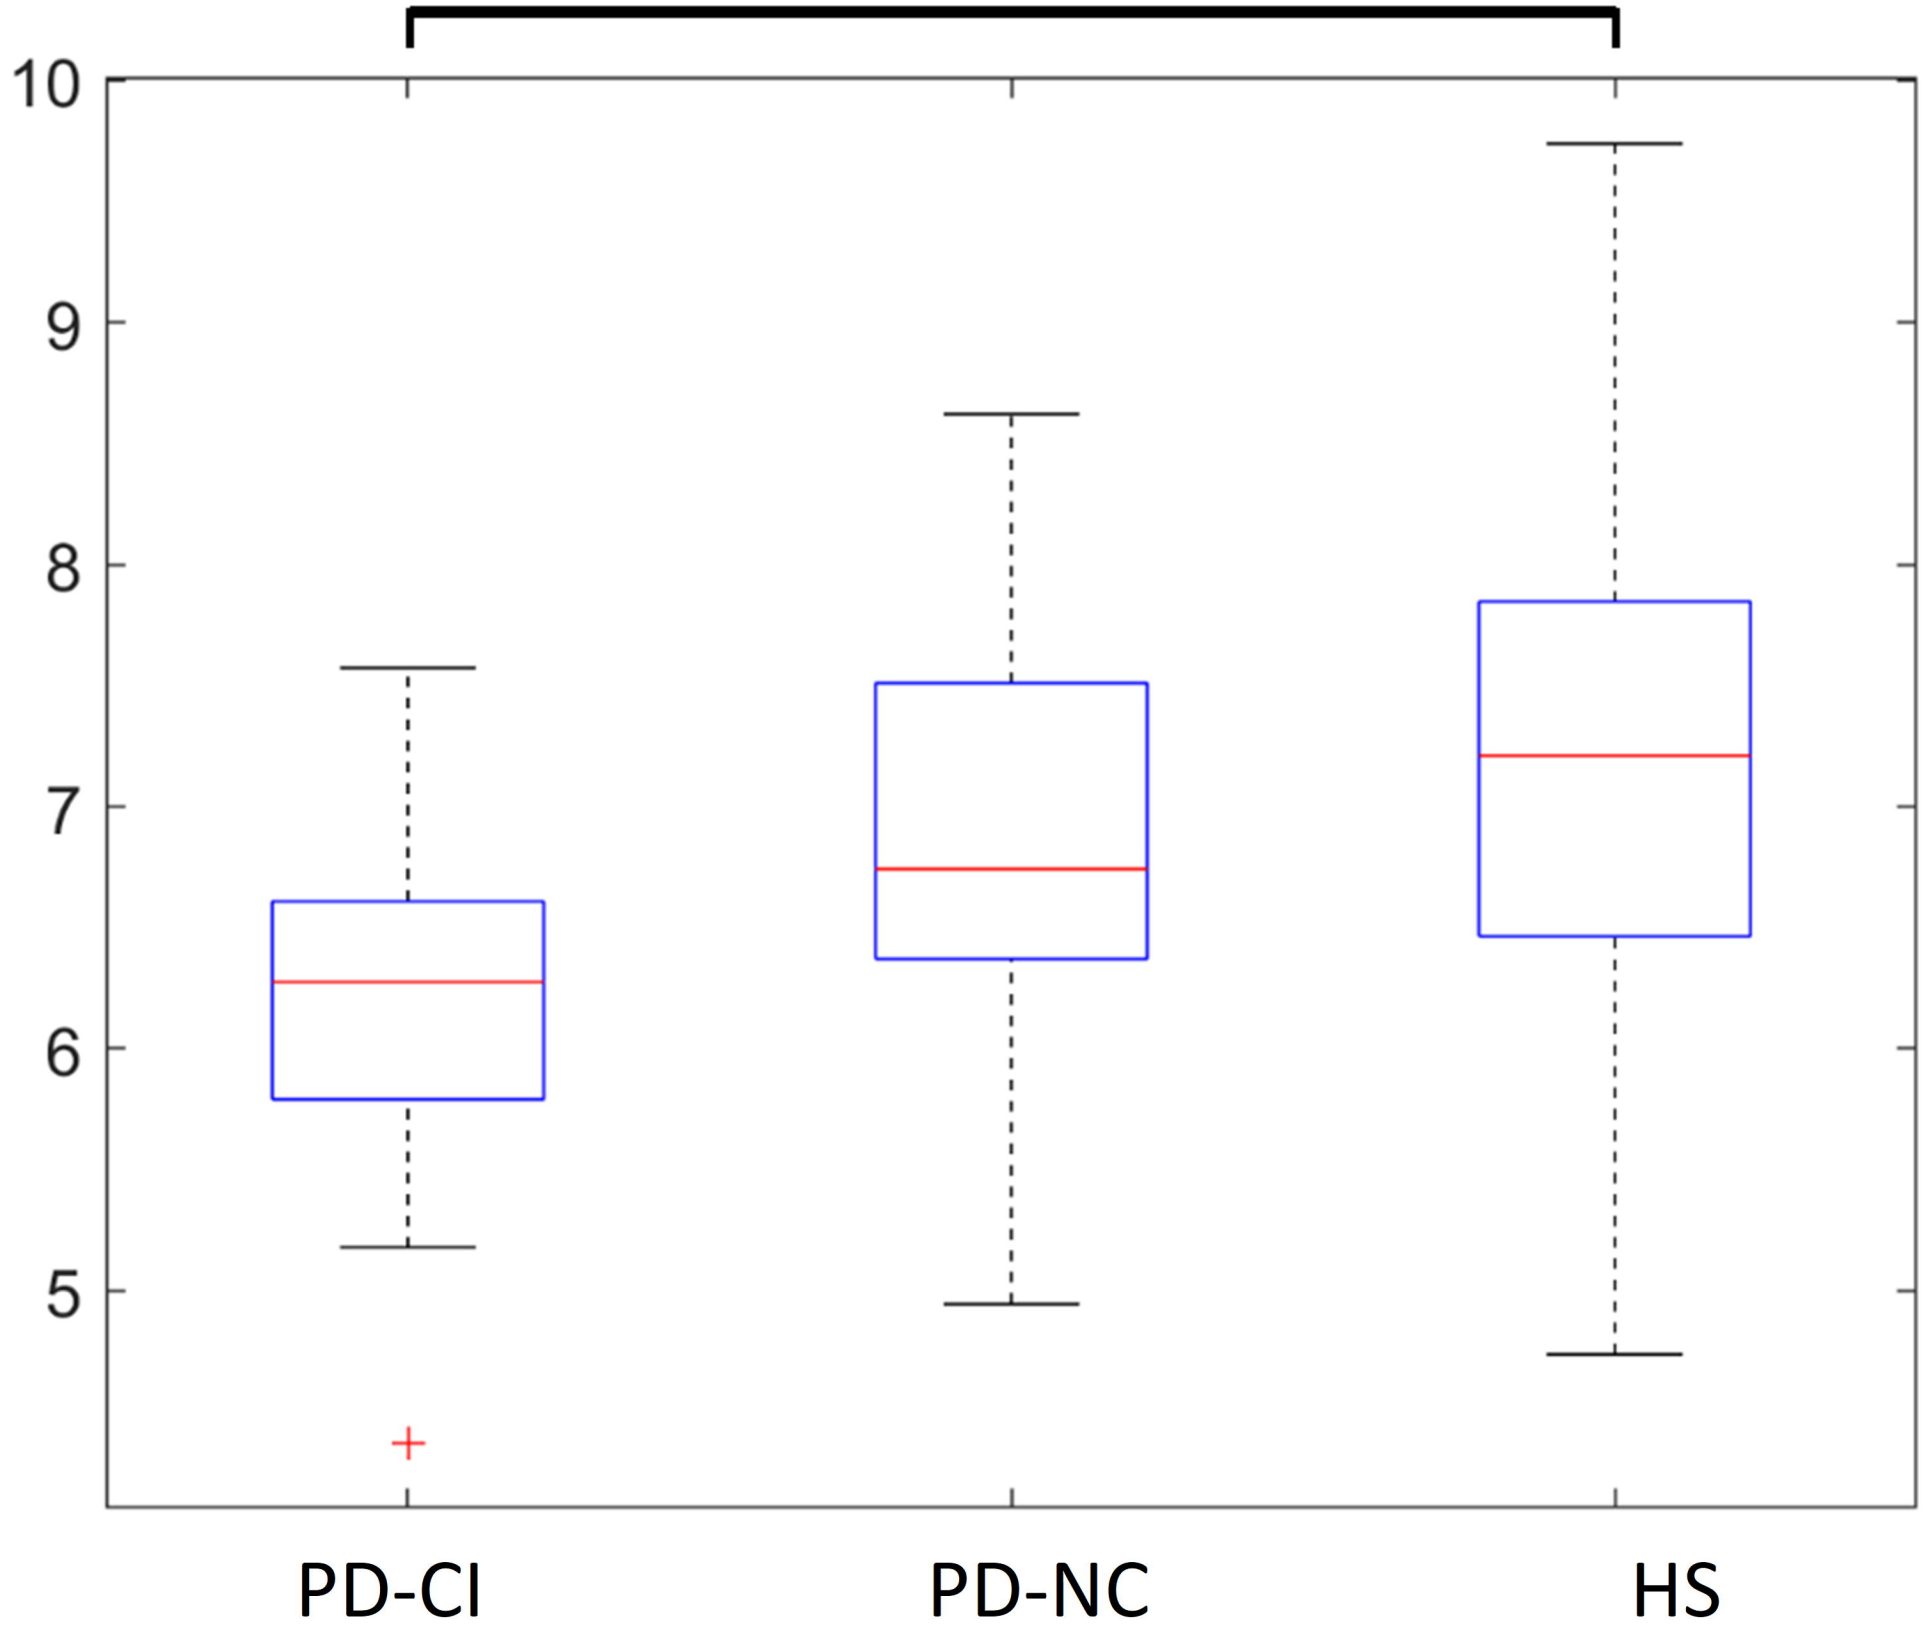

### Delta band

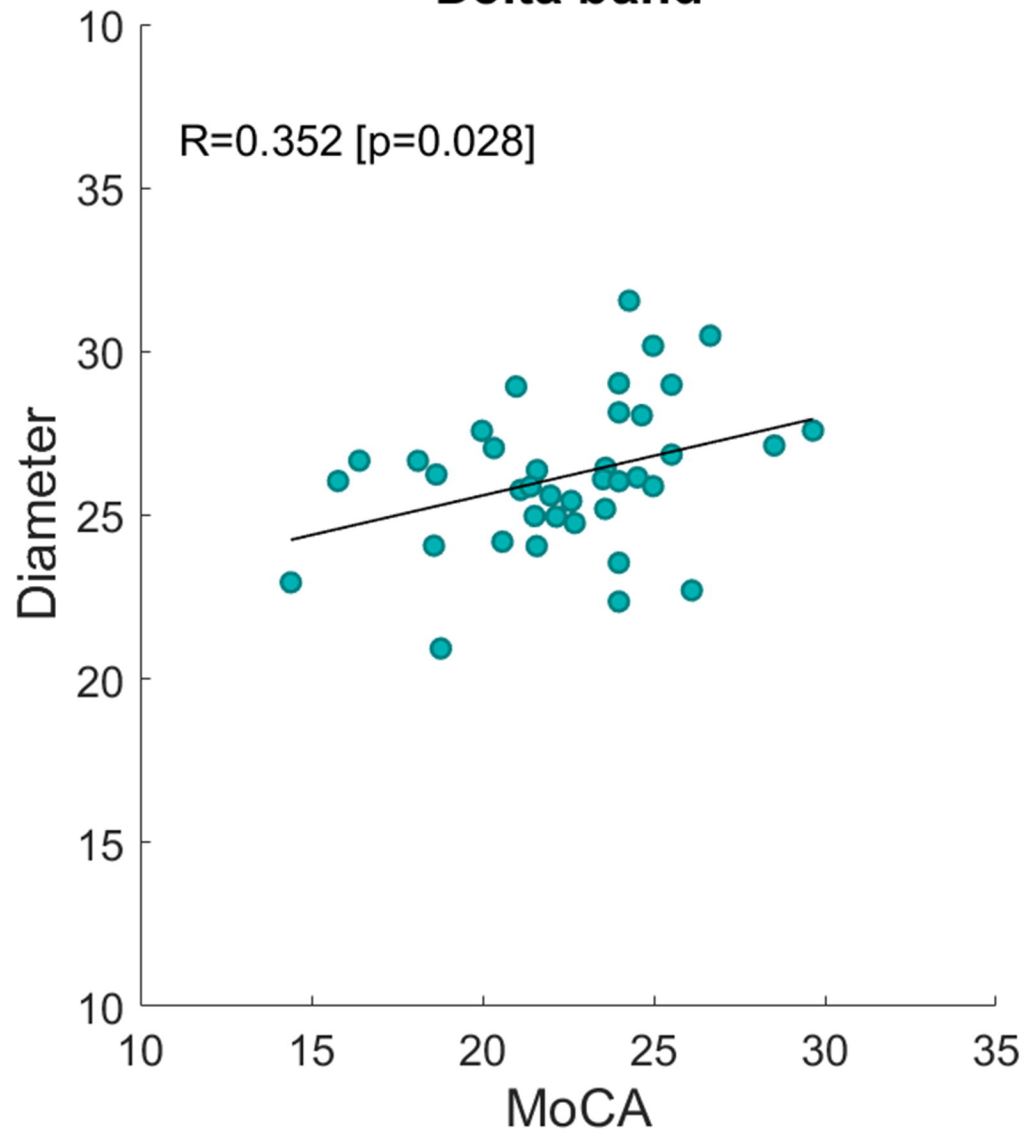

### Alpha band

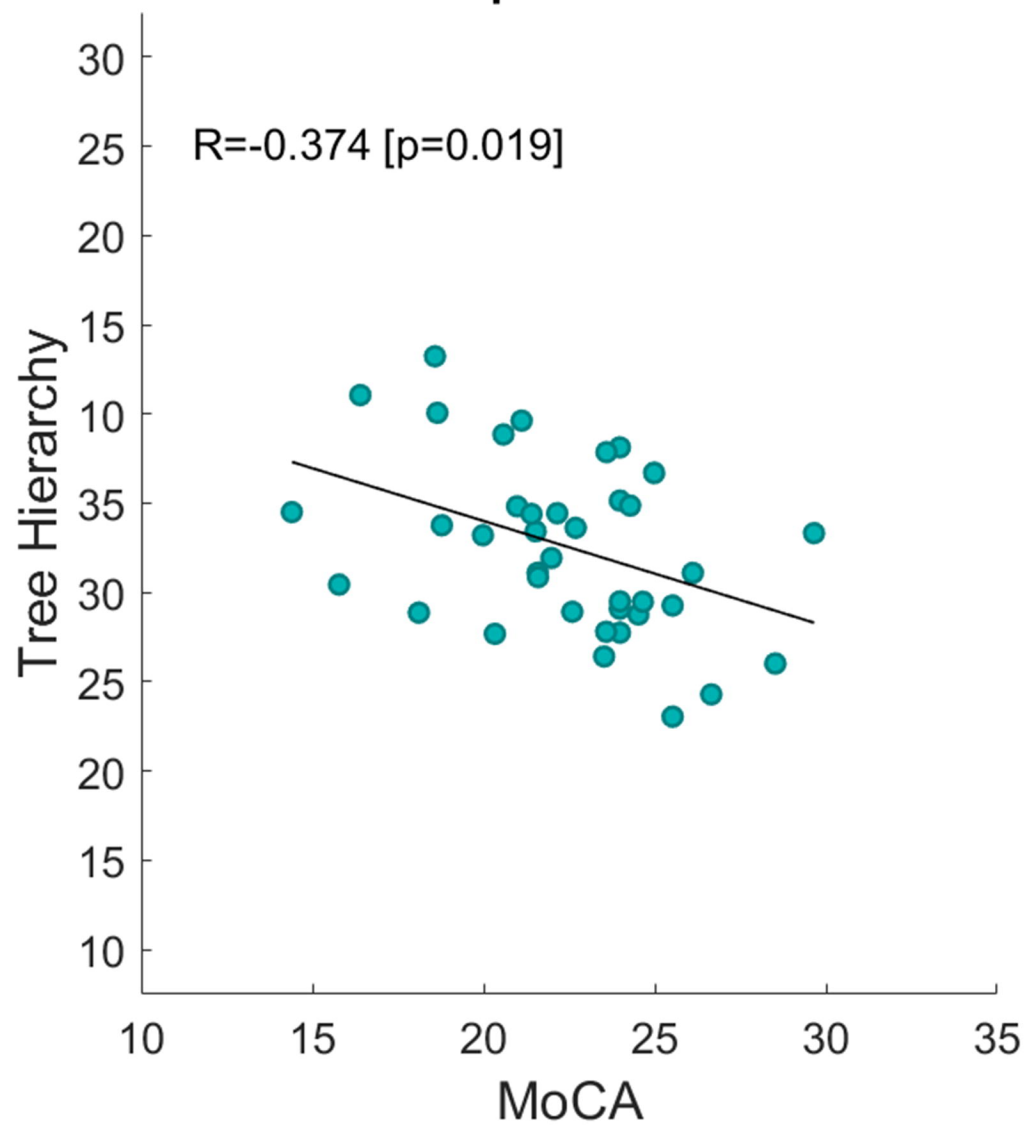

Source: https://biorxiv.org/content/10.1101/2020.12.14.422706v1.full.pdf
